# Supplementary material for: Highly active higher coordinated copper(i)–N-heterocyclic chalcogenone catalysed click chemistry
Source: Royal Society of Chemistry journal article supplement (doi:10.1039/d3nj01875j), 2023-01-01
Supplement: d3nj01875j1.pdf [file d3nj01875j1.pdf]

## Supporting Information

### Contents

| <b>Experimental Section</b>                                                                                                                                                         |       |
|-------------------------------------------------------------------------------------------------------------------------------------------------------------------------------------|-------|
| <b>Fig. S1.</b> <sup>1</sup> H NMR spectrum of <b>L</b> <sup>1</sup> in CDCl <sub>3</sub> at 25 °C                                                                                  | 2     |
| <b>Fig. S2.</b> <sup>13</sup> C NMR spectrum of <b>L</b> <sup>1</sup> in CDCl <sub>3</sub> at 25 °C.                                                                                | 2     |
| <b>Fig. S3.</b> FT-IR spectrum of <b>L</b> <sup>1</sup> (KBr method) at 25 °C                                                                                                       | 3     |
| <b>Fig. S4.</b> <sup>1</sup> H NMR spectrum of <b>L</b> <sup>2</sup> in CDCl <sub>3</sub> at 25 °C.                                                                                 | 3     |
| <b>Fig. S5.</b> <sup>13</sup> C NMR spectrum of <b>L</b> <sup>2</sup> in CDCl <sub>3</sub> at 25 °C at 25 °C.                                                                       | 4     |
| <b>Fig. S6.</b> FT-IR spectrum of <b>L</b> <sup>2</sup> (KBr method) at 25 °C                                                                                                       | 4     |
| <b>Fig. S7.</b> <sup>1</sup> H NMR spectrum of <b>L</b> <sup>3</sup> in CDCl <sub>3</sub> at 25 °C.                                                                                 | 5     |
| <b>Fig. S8.</b> <sup>13</sup> C NMR spectrum of <b>L</b> <sup>3</sup> in CDCl <sub>3</sub> at 25 °C at 25 °C                                                                        | 5     |
| <b>Fig. S9.</b> FT-IR spectrum of <b>L</b> <sup>3</sup> (KBr method) at 25 °C                                                                                                       | 6     |
| <b>Fig. S10.</b> <sup>1</sup> H NMR spectrum of <b>1</b> in DMSO- <i>d</i> <sub>6</sub> at 25 °C.                                                                                   | 6     |
| <b>Fig. S11.</b> FT-IR spectrum of <b>1</b> at 25 °C (KBr method).                                                                                                                  | 7     |
| <b>Fig. S12.</b> <sup>1</sup> H NMR spectrum of <b>2</b> in DMSO- <i>d</i> <sub>6</sub> at 25 °C.                                                                                   | 7     |
| <b>Fig. S13.</b> FT-IR spectrum of <b>2</b> at 25 °C (KBr method).                                                                                                                  | 8     |
| <b>Fig. S14.</b> <sup>1</sup> H NMR spectrum of <b>3</b> in DMSO- <i>d</i> <sub>6</sub> at 25 °C                                                                                    | 8     |
| <b>Fig. S15.</b> FT-IR spectrum of <b>3</b> (KBr method) at 25 °C.                                                                                                                  | 9     |
| <b>Fig. S16.</b> <sup>1</sup> H NMR spectrum of <b>4</b> in DMSO- <i>d</i> <sub>6</sub> at 25 °C                                                                                    | 9     |
| <b>Fig. S17.</b> FT-IR spectrum of <b>4</b> at 25 °C (KBr method).                                                                                                                  | 10    |
| <b>Fig. S18.</b> <sup>1</sup> H NMR spectrum of <b>5</b> in DMSO- <i>d</i> <sub>6</sub> at 25 °C                                                                                    | 10    |
| <b>Fig. S19.</b> FT-IR spectrum of <b>5</b> at 25 °C (KBr method).                                                                                                                  | 11    |
| <b>Fig. S20.</b> <sup>1</sup> H NMR spectrum of <b>6</b> in DMSO- <i>d</i> <sub>6</sub> at 25 °C                                                                                    | 11    |
| <b>Fig. S21.</b> FT-IR spectrum of <b>6</b> at 25 °C (KBr method).                                                                                                                  | 12    |
| <b>Fig. S22.</b> <sup>1</sup> H NMR spectrum of <b>7</b> in DMSO- <i>d</i> <sub>6</sub> at 25 °C.                                                                                   | 12    |
| <b>Fig. S23.</b> FT-IR spectrum of <b>7</b> at 25 °C (KBr method)                                                                                                                   | 13    |
| <b>Fig. S24.</b> <sup>1</sup> H NMR spectrum of <b>1a</b> in CDCl <sub>3</sub> at 25 °C                                                                                             | 13    |
| <b>Fig. S25.</b> <sup>1</sup> H NMR spectrum of <b>1b</b> in CDCl <sub>3</sub> at 25 °C.                                                                                            | 14    |
| <b>Fig. S26.</b> <sup>1</sup> H NMR spectrum of <b>1c</b> in CDCl <sub>3</sub> at 25 °C.                                                                                            | 14    |
| <b>Fig. S27.</b> <sup>1</sup> H NMR spectrum of <b>1d</b> in DMSO- <i>d</i> <sub>6</sub> at 25 °C.                                                                                  | 15    |
| <b>Fig. S28.</b> <sup>1</sup> H NMR of <b>1e</b> in CDCl <sub>3</sub> at 25 °C.                                                                                                     | 15    |
| <b>Fig. S29.</b> <sup>1</sup> H NMR of <b>1f</b> in CDCl <sub>3</sub> at 25 °C.                                                                                                     | 16    |
| <b>Fig. S30.</b> <sup>1</sup> H NMR of <b>1g</b> in CDCl <sub>3</sub> at 25 °C.                                                                                                     | 16    |
| <b>Fig. S31.</b> <sup>1</sup> H NMR of <b>1h</b> in CDCl <sub>3</sub> at 25 °C.                                                                                                     | 17    |
| <b>Fig. S32.</b> Effect of catalyst <b>7</b> loading on [3+2] cycloaddition reaction between mesityl azide and phenylacetylene at ambient temperature, 2 h in DCM and MeOH mixture. | 17    |
| <b>Fig. S33.</b> FT-IR spectra of a mixture of phenylacetylene and mesityl azide in 0 min. and 120 min                                                                              | 18    |
| <b>Fig. S34.</b> The thermal ellipsoidal structures of <b>1-7</b> . The hydrogen atoms have been omitted for clarity.                                                               | 18-19 |
| <b>Table. S1</b> The structural parameter of <b>1-4</b>                                                                                                                             | 19-20 |
| <b>Table. S2</b> The structural parameter of <b>5-7</b>                                                                                                                             | 20    |
| <b>Table. S3</b> Selected bond lengths of <b>1-6</b>                                                                                                                                | 21    |
| <b>Table. S4</b> Selected bond angles of <b>1-6</b>                                                                                                                                 | 21    |
| <b>Table. S5</b> Selected bond lengths and angles of <b>7</b>                                                                                                                       | 21    |
| <b>Table. S6.</b> Comparison of catalytic efficiency of <b>7</b> with known Cu(I) catalysts for the formation of triazole product.                                                  | 21-23 |

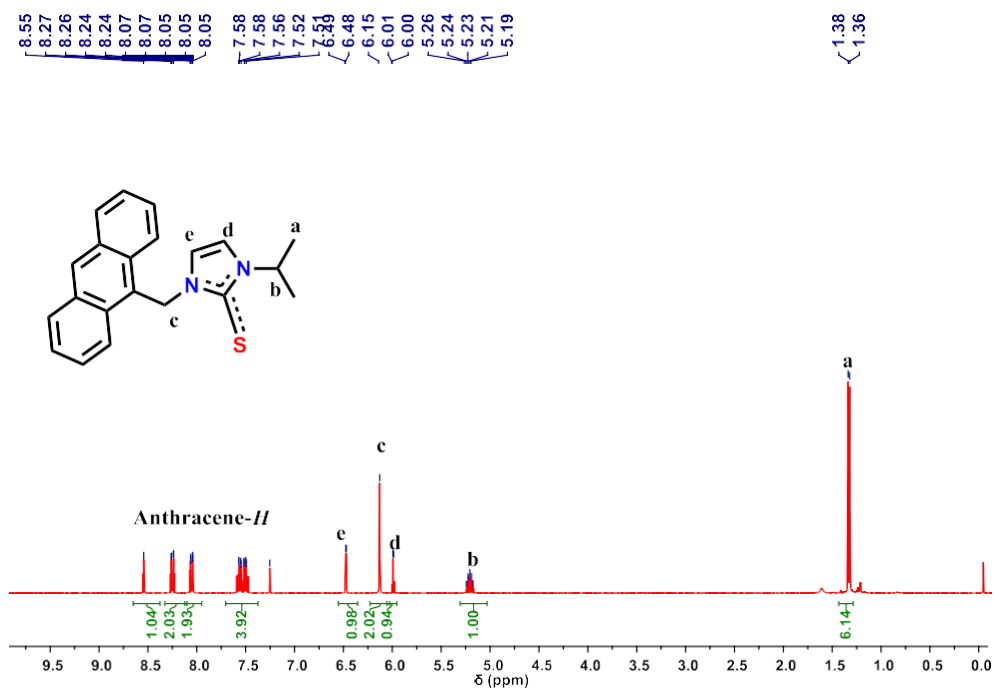

Fig. S1. <sup>1</sup>H NMR of L<sup>1</sup> in CDCl<sub>3</sub> at 25 °C

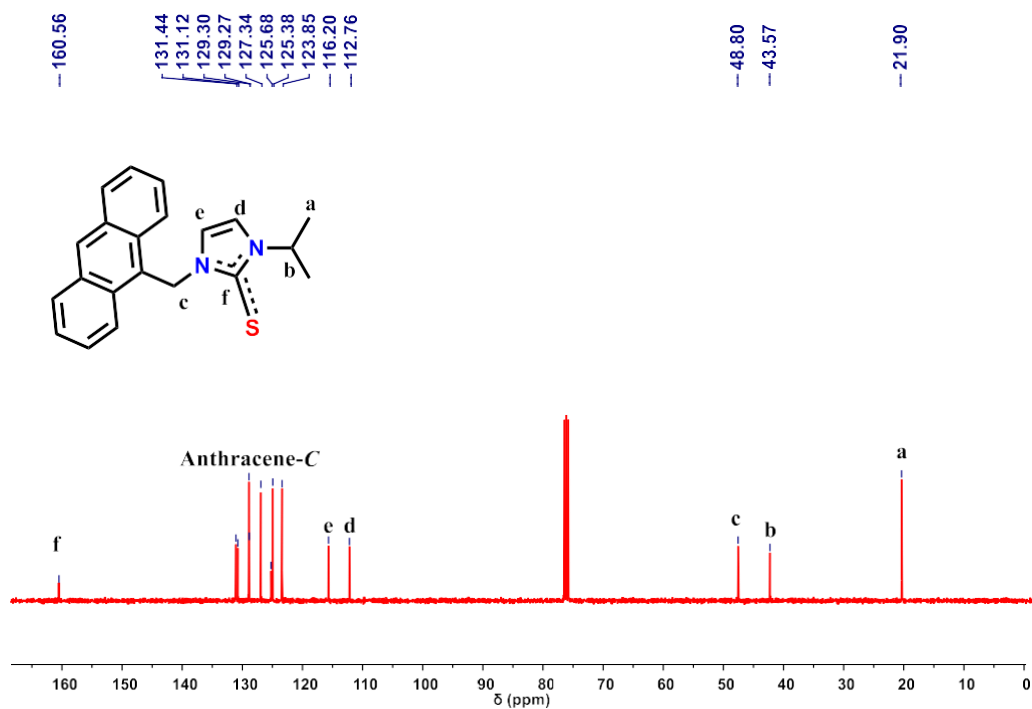

Fig. S2. <sup>13</sup>C NMR of L<sup>1</sup> in CDCl<sub>3</sub> at 25 °C

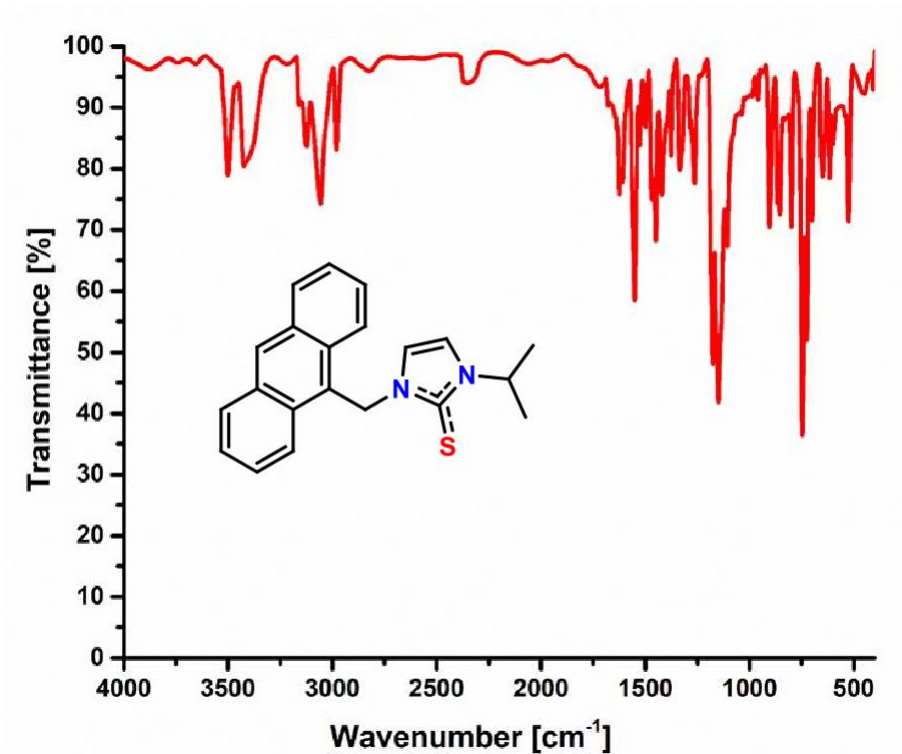

Fig. S3. FT-IR spectrum of L<sup>1</sup> (KBr method) at 25 °C

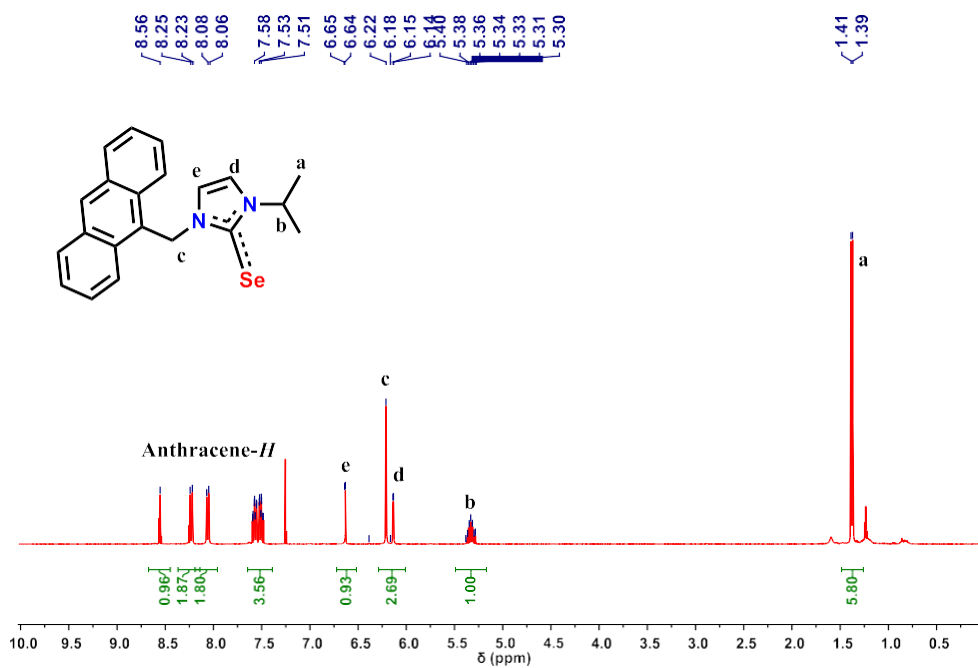

Fig. S4. <sup>1</sup>H NMR of L<sup>2</sup> in CDCl<sub>3</sub> at 25 °C

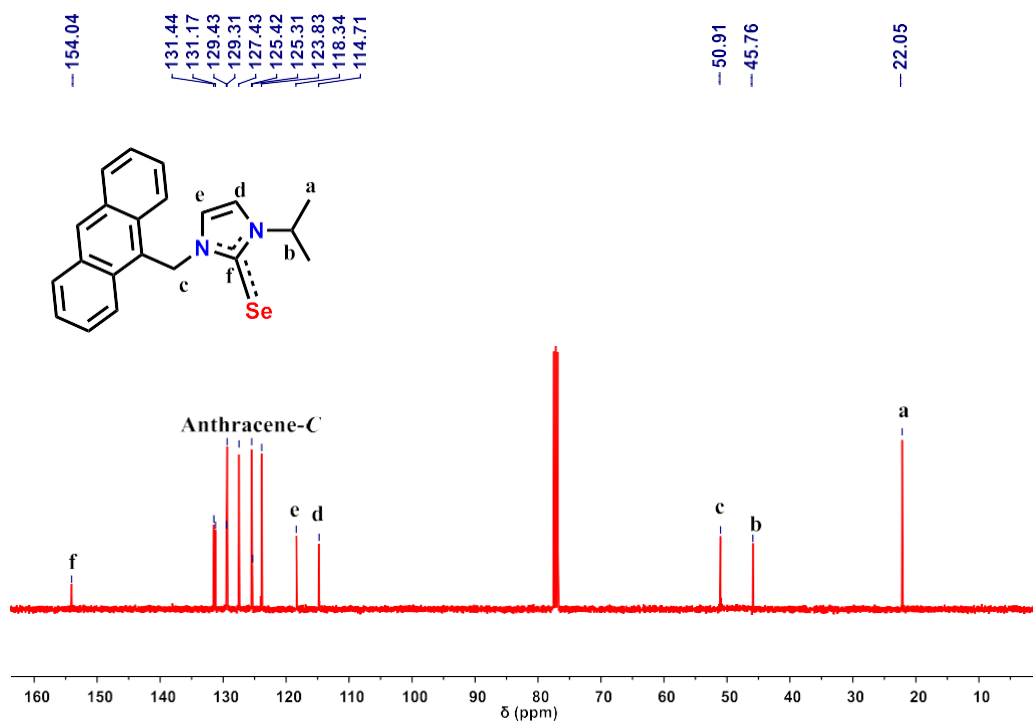

Fig. S5.  $^{13}\text{C}$  NMR of  $\text{L}^2$  in  $\text{CDCl}_3$  at  $25^\circ\text{C}$

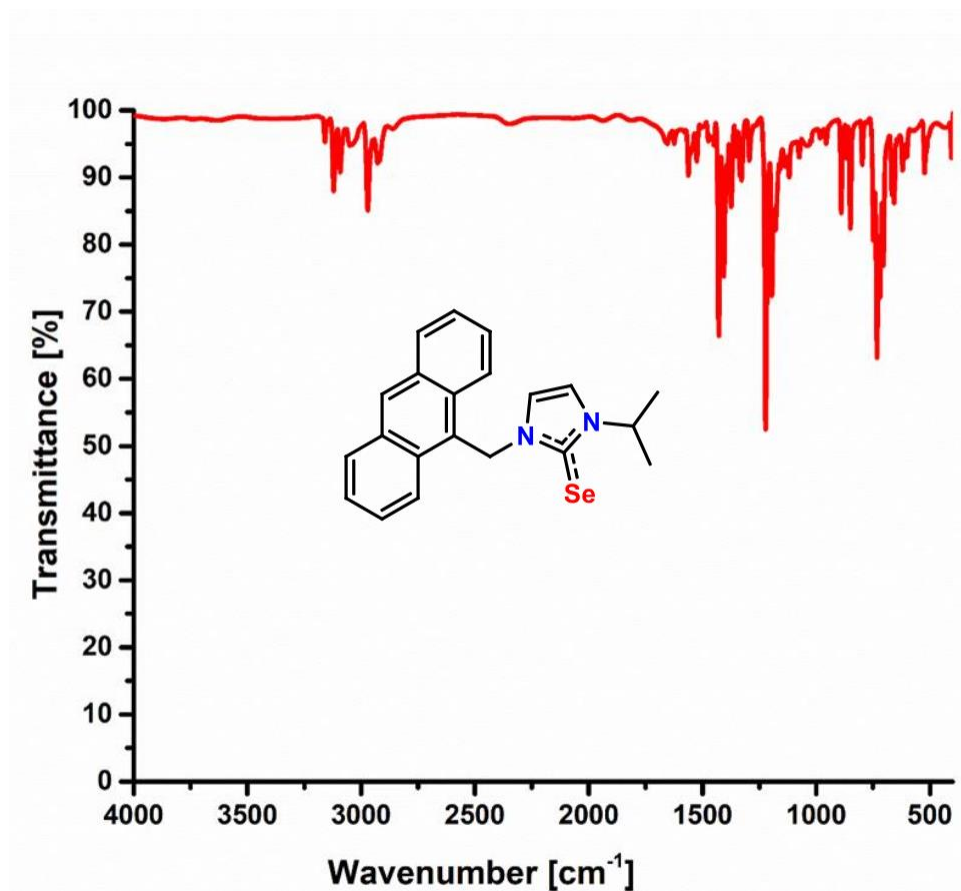

Fig. S6. FT-IR of  $\text{L}^2$  (KBr method) at  $25^\circ\text{C}$

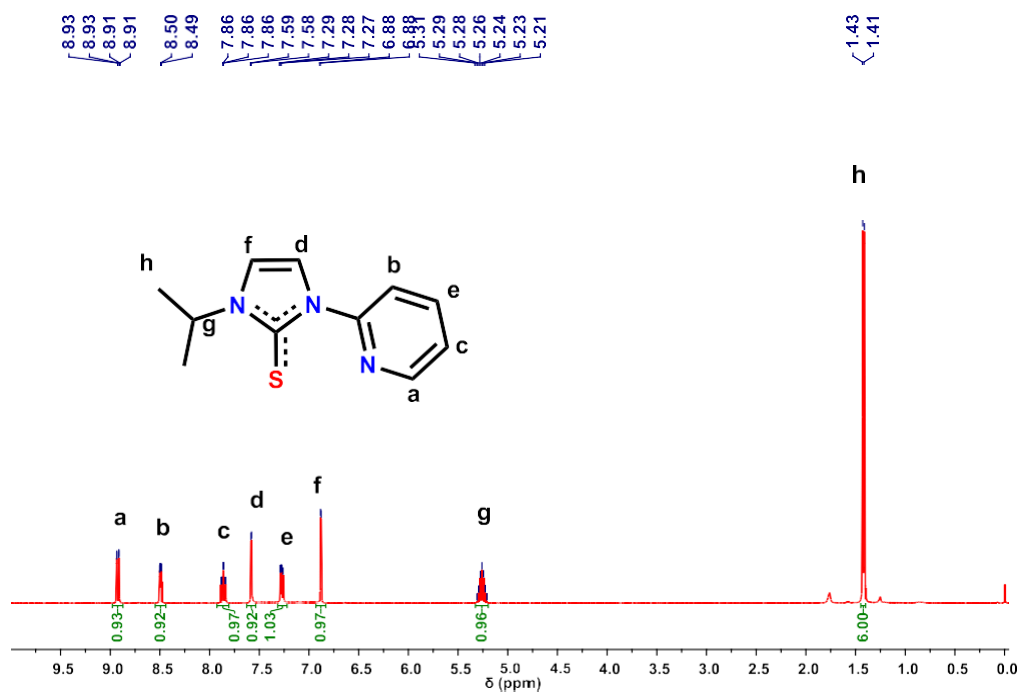

Fig. S7.  $^1\text{H}$  NMR of  $\text{L}^3$  in  $\text{CDCl}_3$  at  $25^\circ\text{C}$

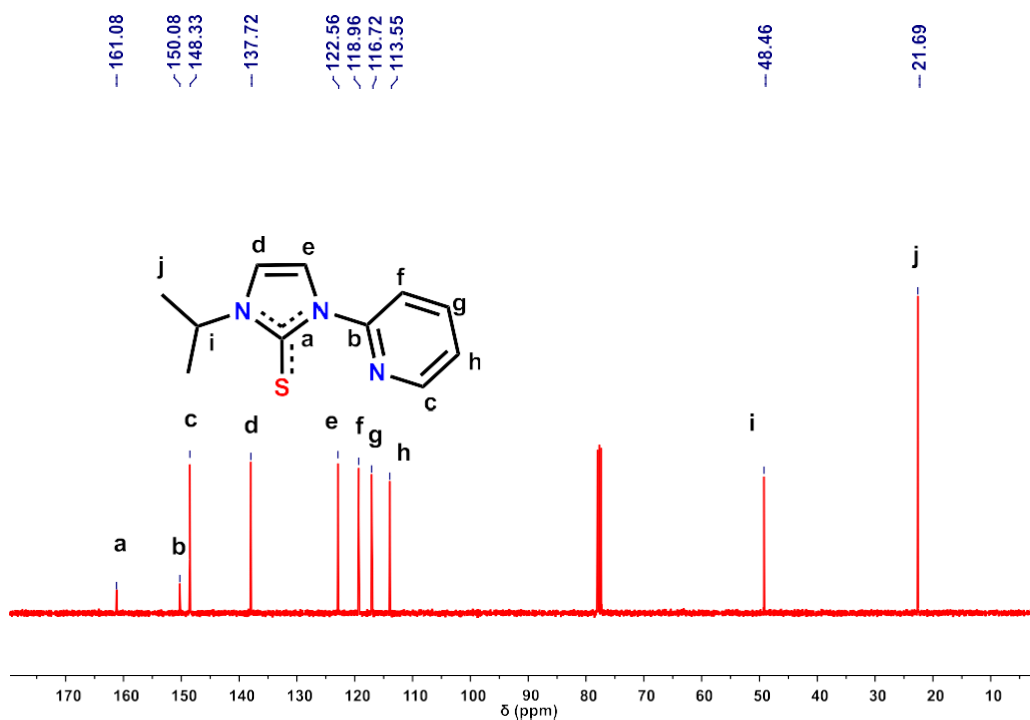

Fig. S8.  $^{13}\text{C}$  NMR of  $\text{L}^3$  in  $\text{CDCl}_3$  at  $25^\circ\text{C}$

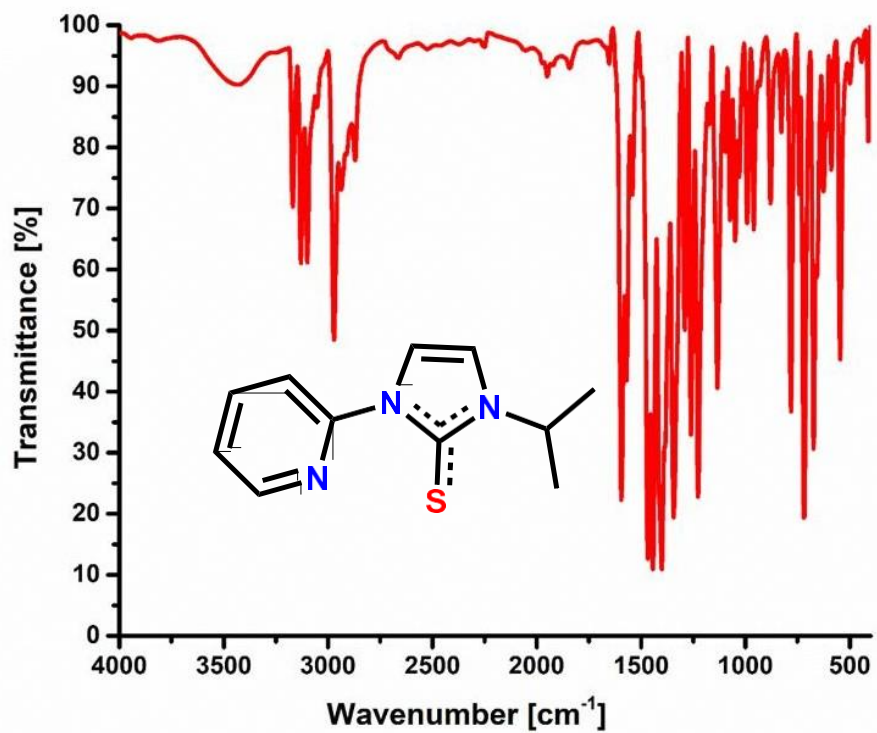

Fig. S9. FT-IR spectrum of  $L^3$  (KBr method) at 25 °C

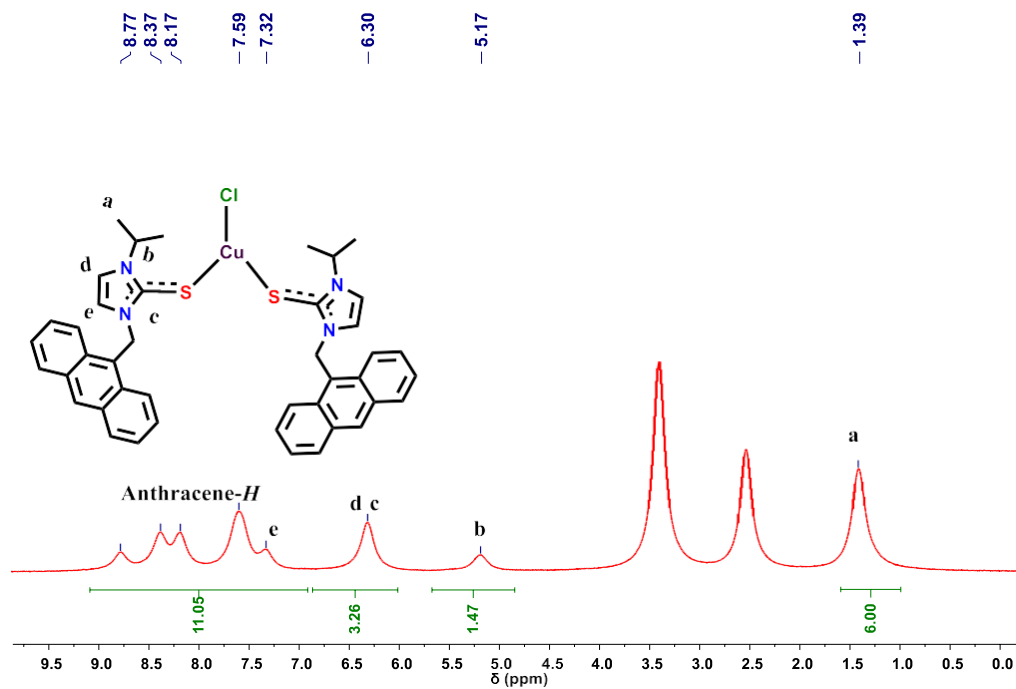

Fig. S10.  $^1\text{H}$  NMR of **1** in  $\text{DMSO-}d_6$  at 25 °C

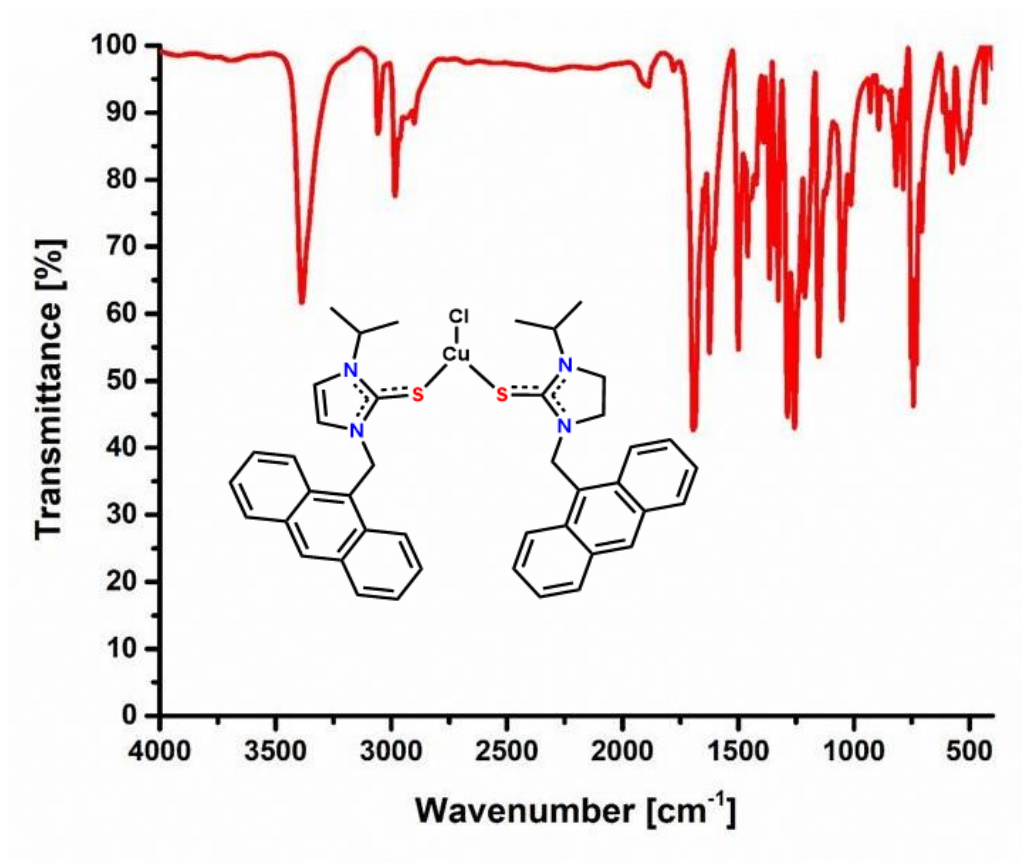

Fig. S11. FT-IR spectrum of **1** (KBr method) at 25 °C

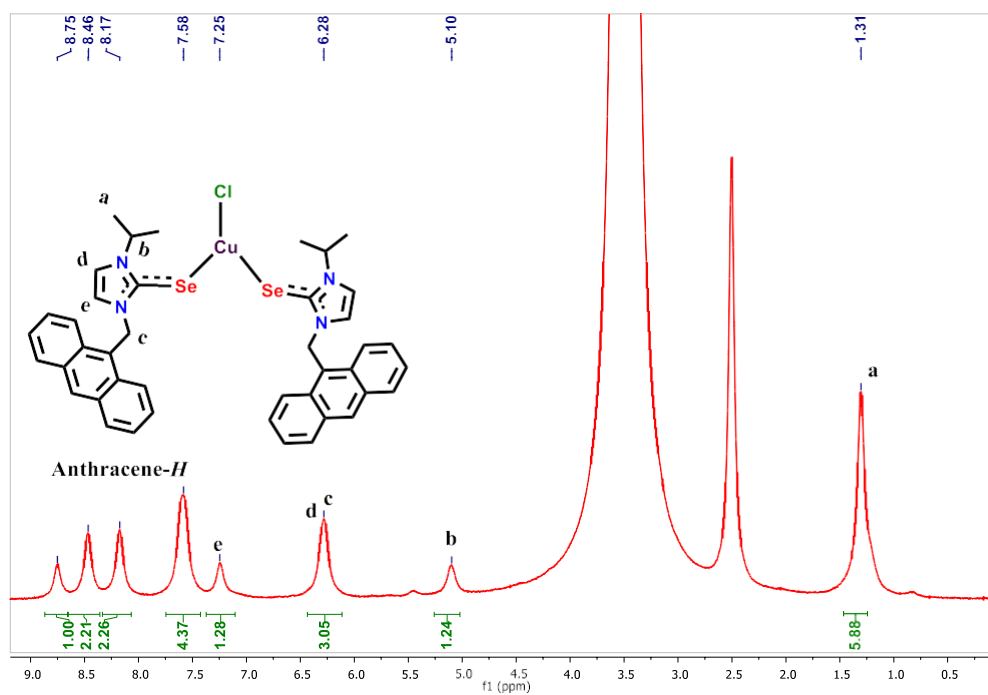

Fig S12.  $^1\text{H}$  NMR of **2** in  $\text{DMSO}-d_6$  at 25 °C

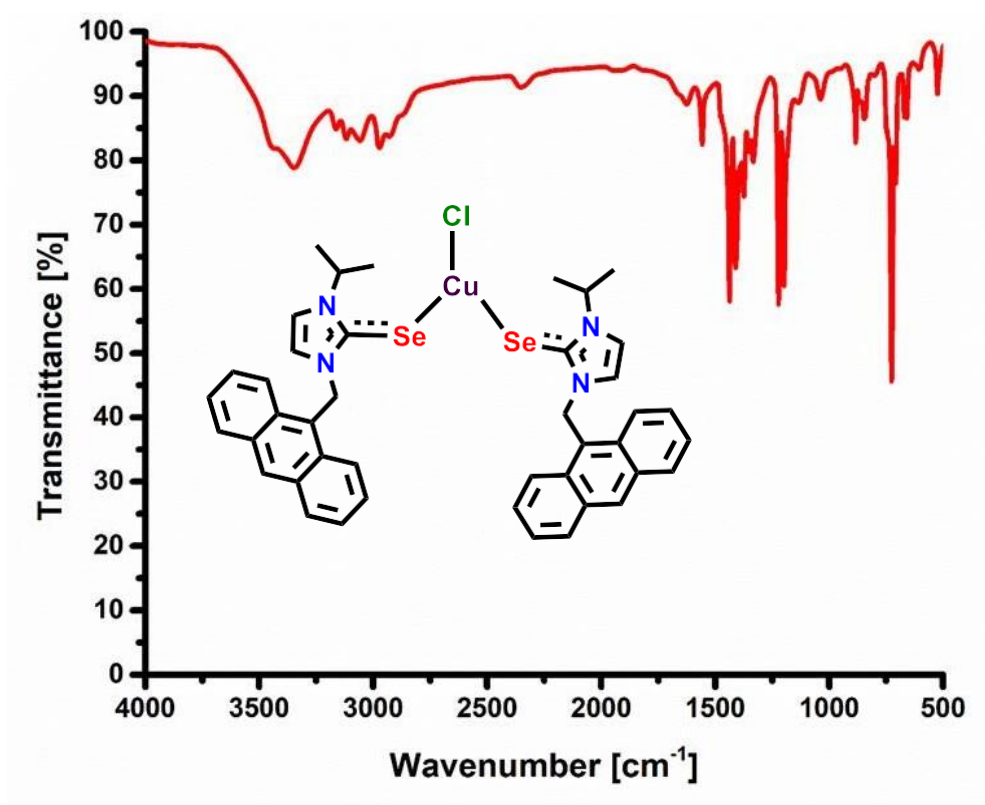

Fig. S13. FT-IR spectrum of **2** (KBr method) at 25 °C

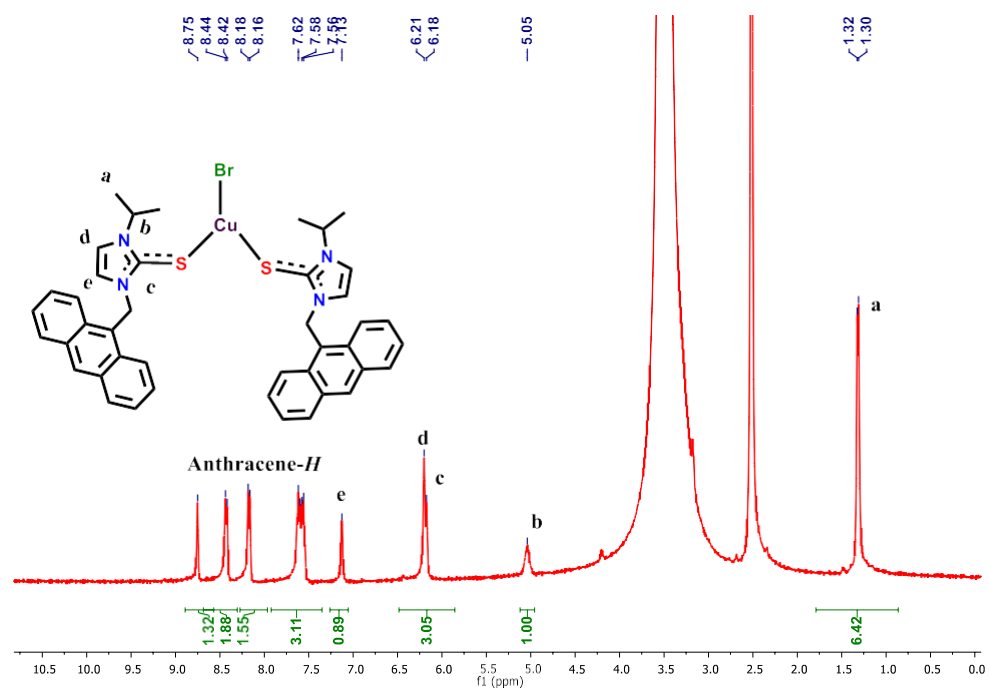

Fig. S14.  $^1\text{H}$  NMR of **3** in  $\text{DMSO-}d_6$  at 25 °C



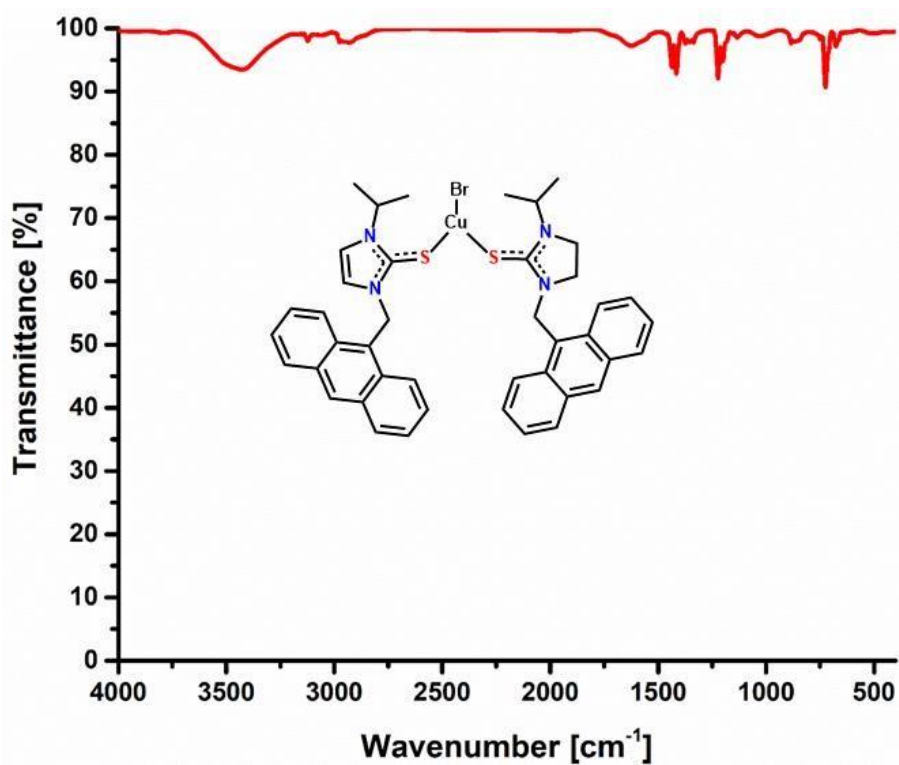

Fig. S15. FT-IR spectrum of **3** (KBr method) at 25 °C

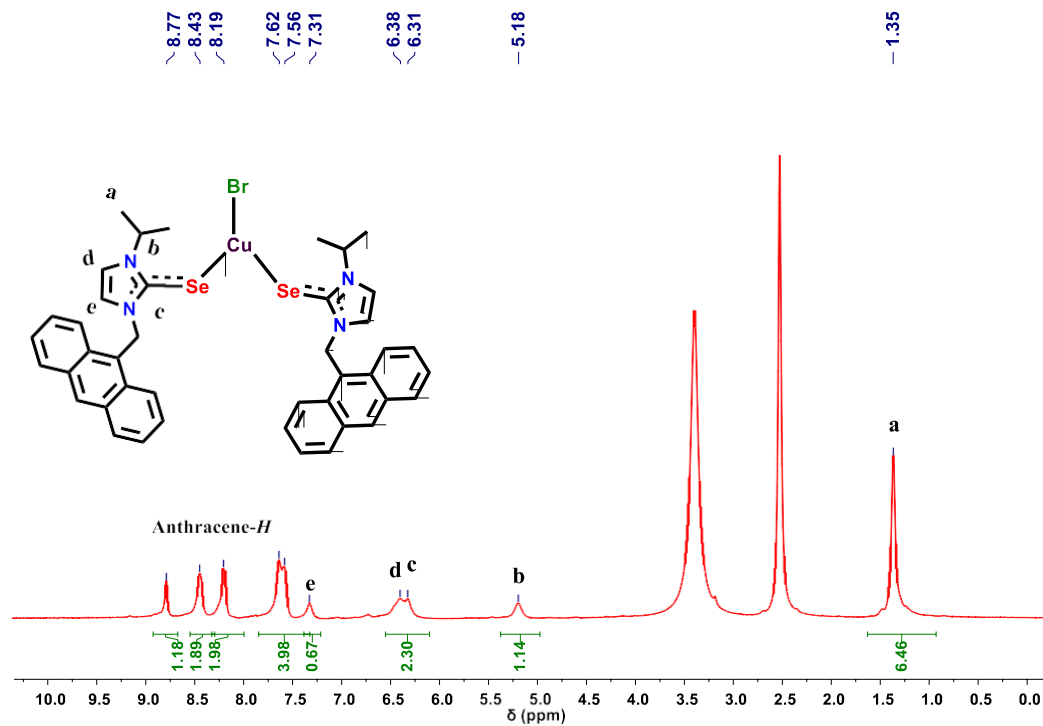

Fig. S16.  $^1\text{H}$  NMR of **4** in  $\text{DMSO-}d_6$  at 25 °C

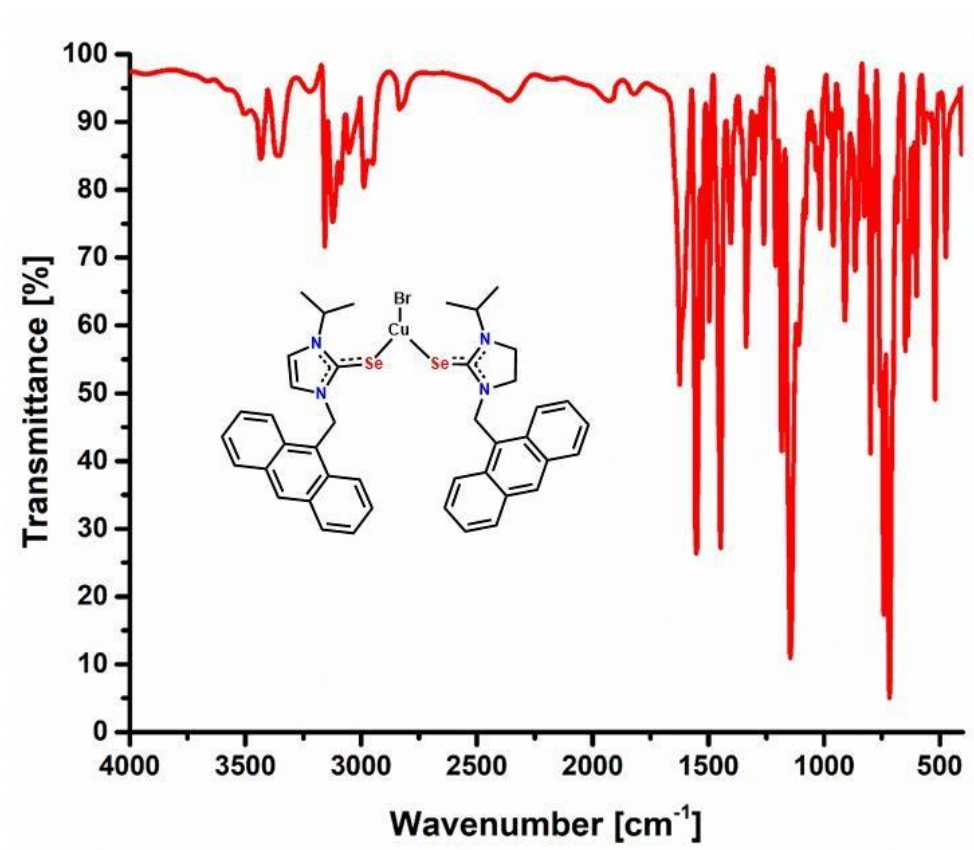

Fig. S17. FT-IR spectrum of **4** (KBr method) at 25 °C

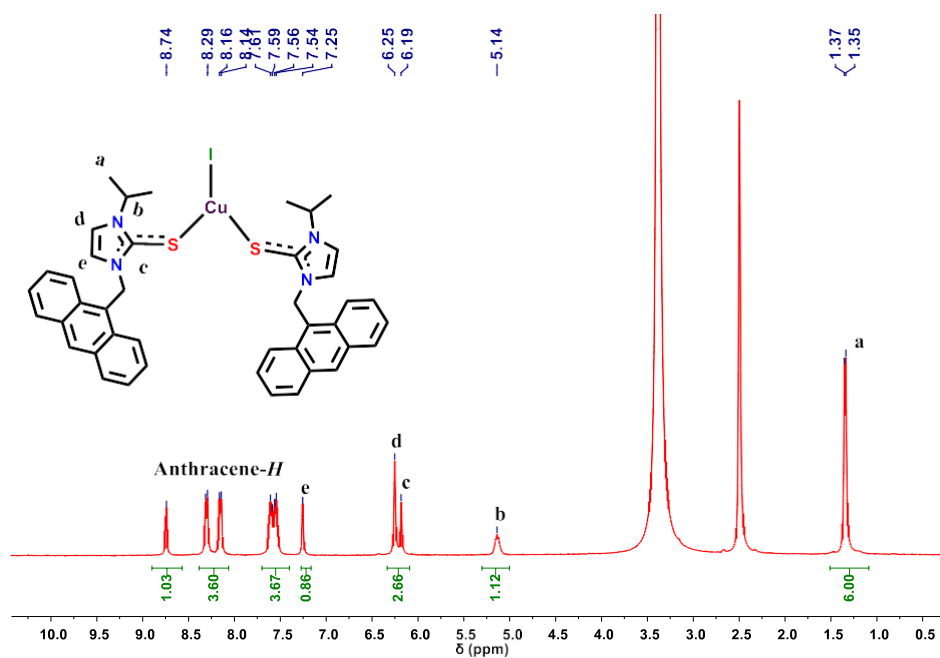

Fig. S18.  $^1\text{H}$  NMR of **5** in  $\text{DMSO-}d_6$  at 25 °C

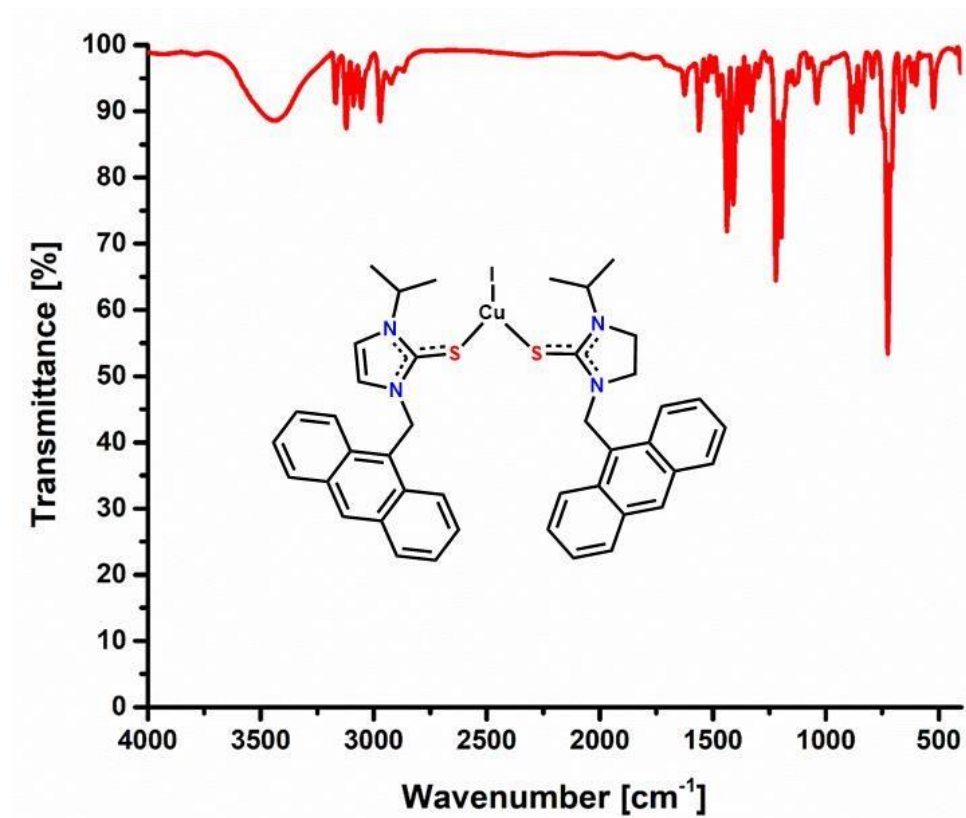

Fig. S19. FT-IR spectrum of 5 (KBr method) at 25 °C

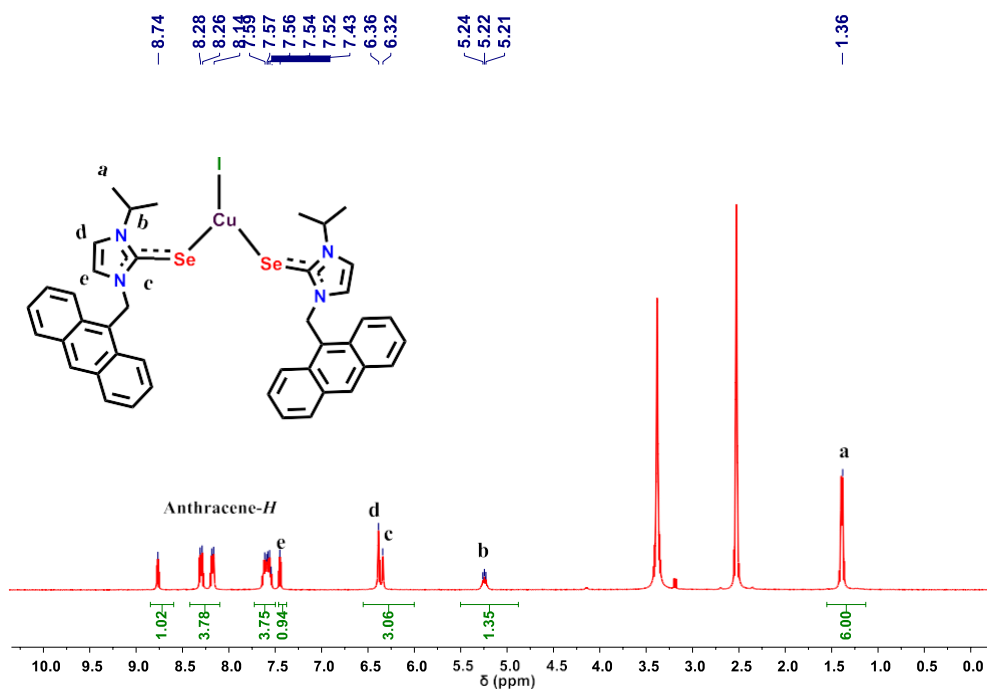

Fig S20.  $^1\text{H}$  NMR of 6 in  $\text{DMSO-}d_6$  at 25 °C

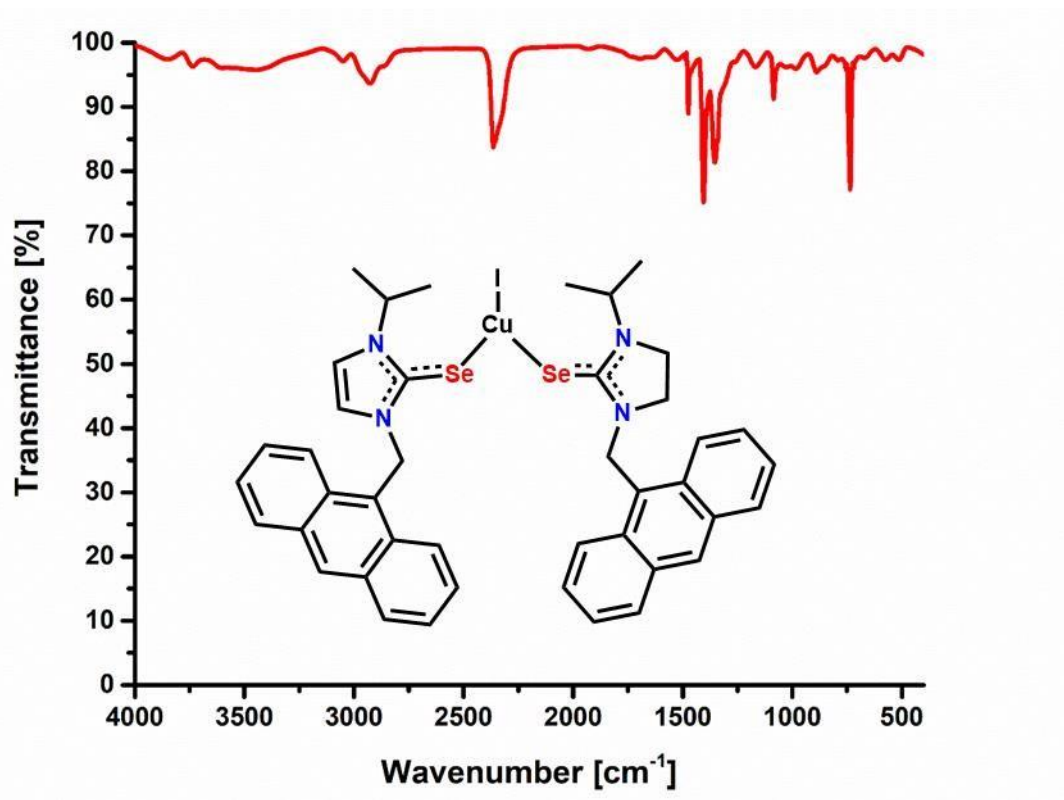

Fig. S21. FT-IR spectrum of **6** (KBr method) at 25 °C

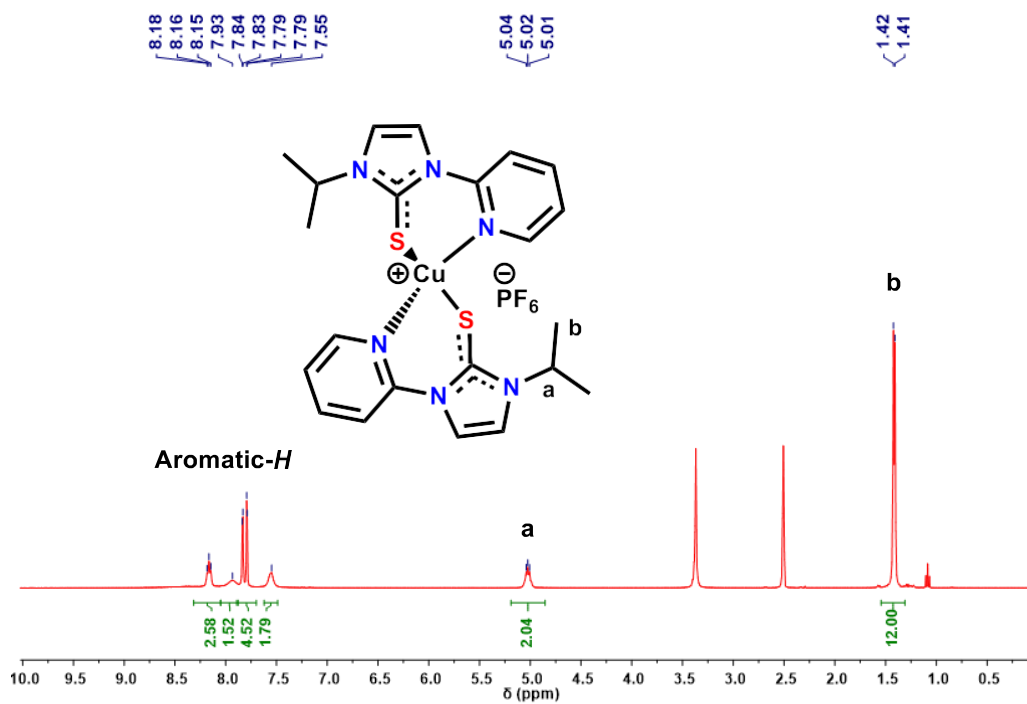

Fig. S22.  $^1\text{H}$  NMR of **7** in  $\text{DMSO-}d_6$  at 25 °C

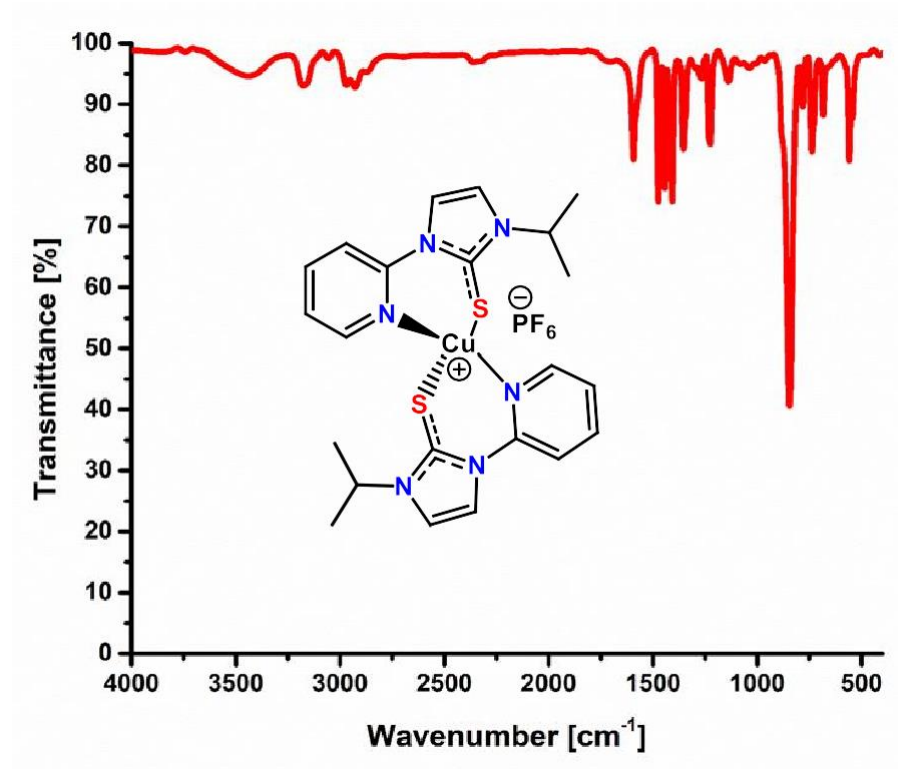

Fig. S23. FT-IR spectrum of 7 (KBr method) at 25 °C

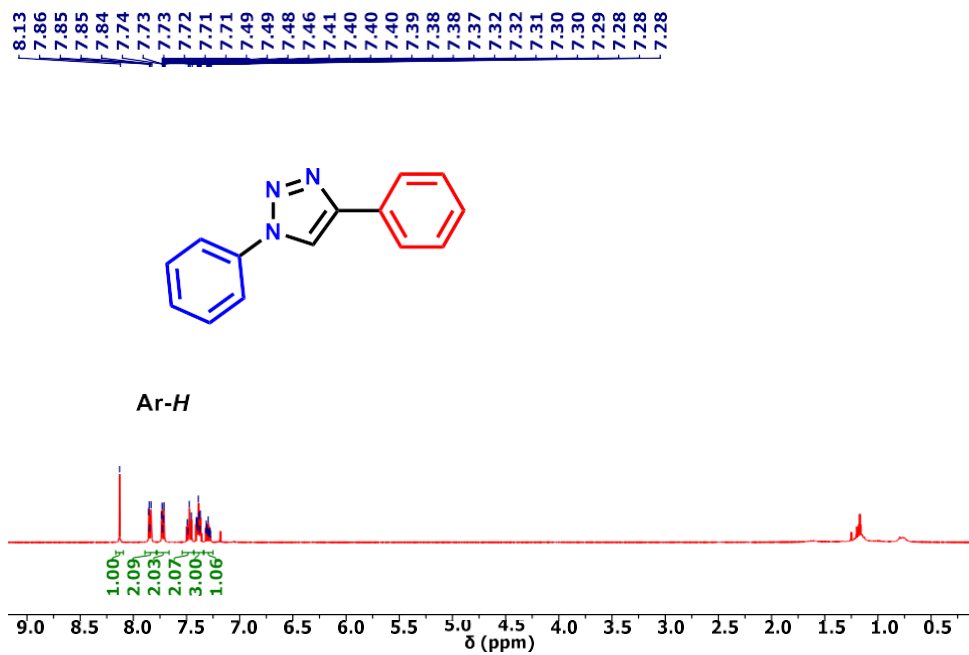

Fig. S24.  $^1\text{H}$  NMR of 1a in  $\text{CDCl}_3$  at 25 °C

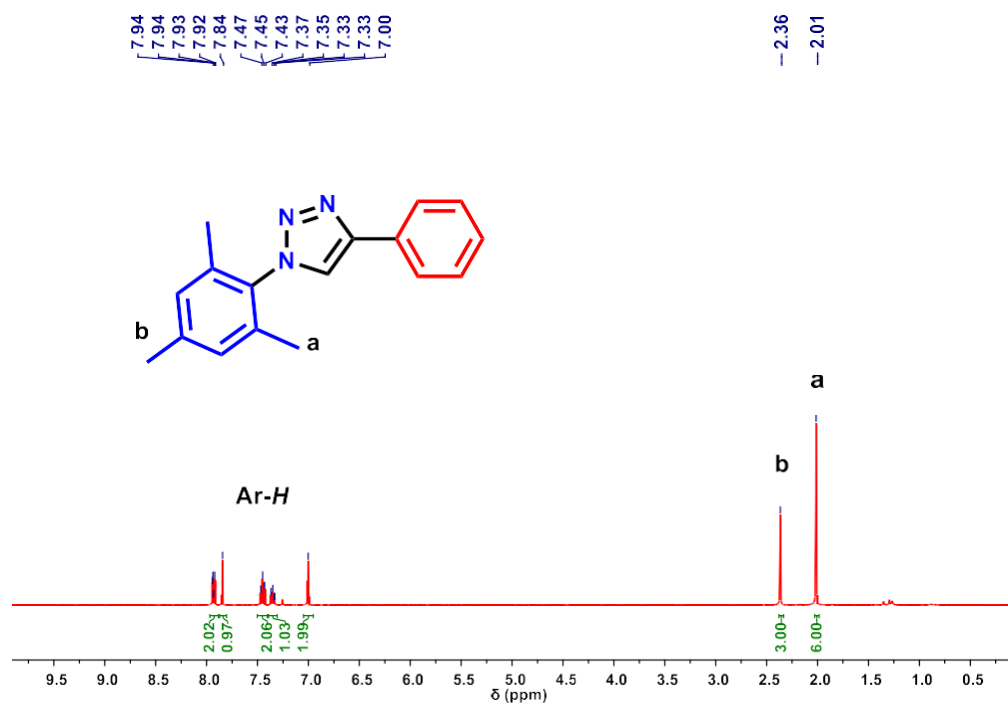

Fig. S25. <sup>1</sup>H NMR of **1b** in CDCl<sub>3</sub> at 25 °C.

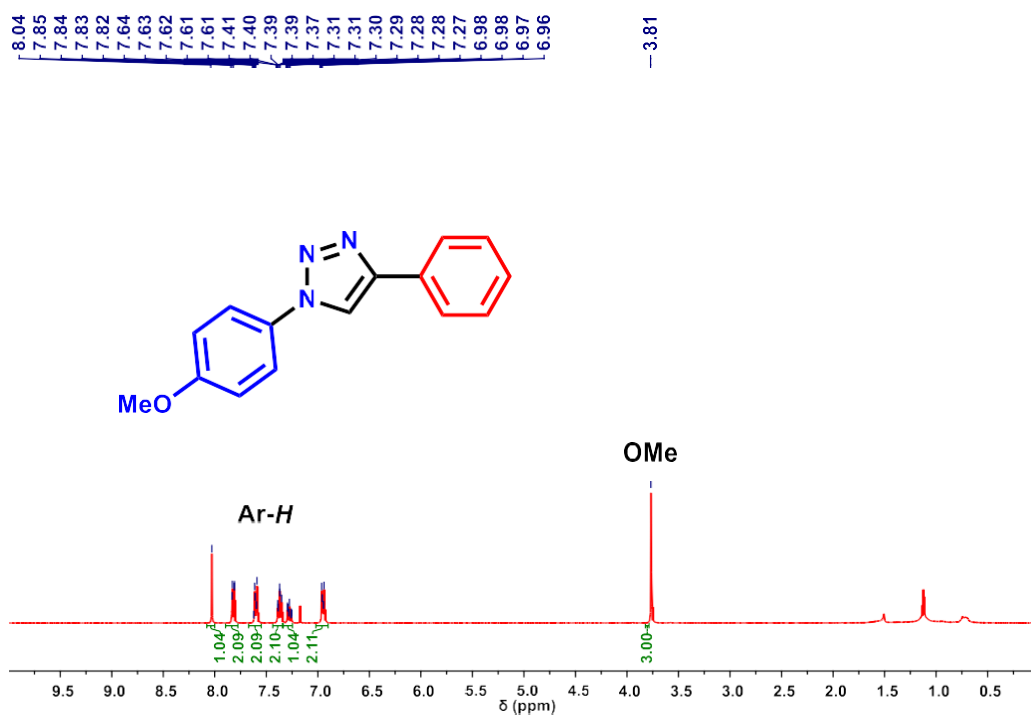

Fig. S26. <sup>1</sup>H NMR of **1c** in CDCl<sub>3</sub> at 25 °C.

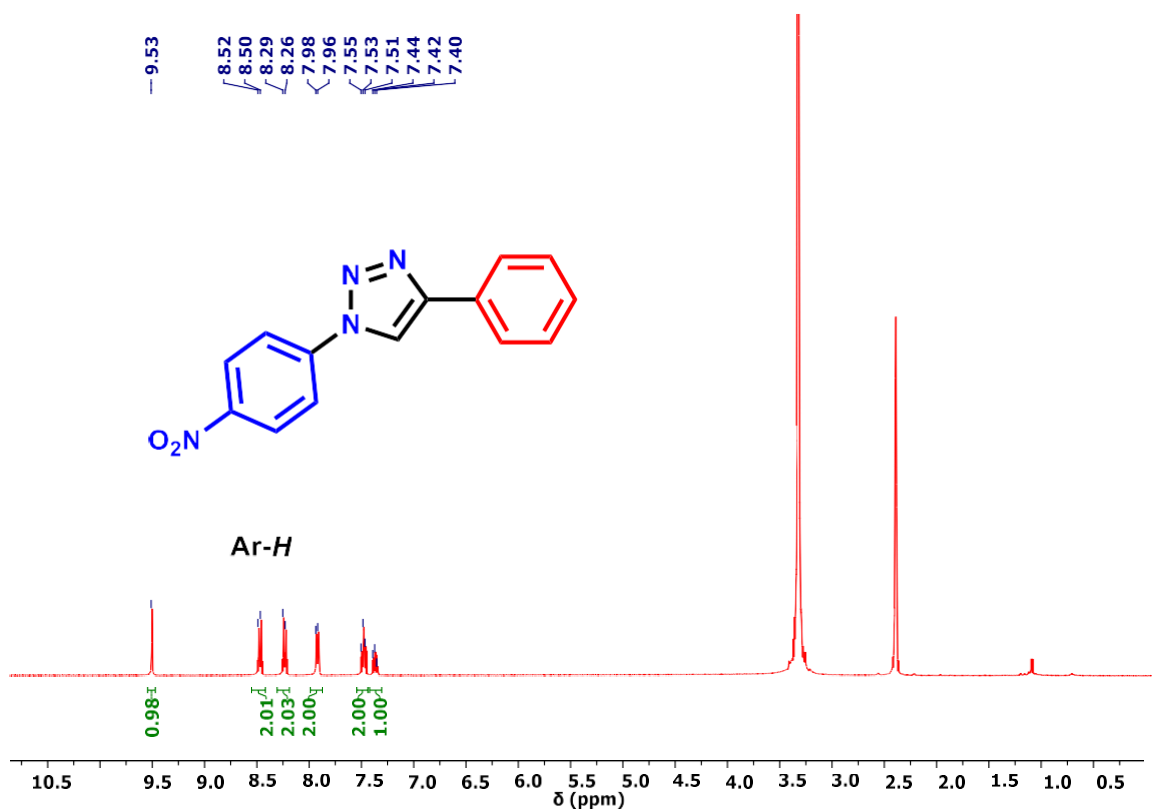

Fig. S27.  $^1\text{H NMR}$  of 1d in  $\text{DMSO-}d_6$  at  $25\text{ }^\circ\text{C}$

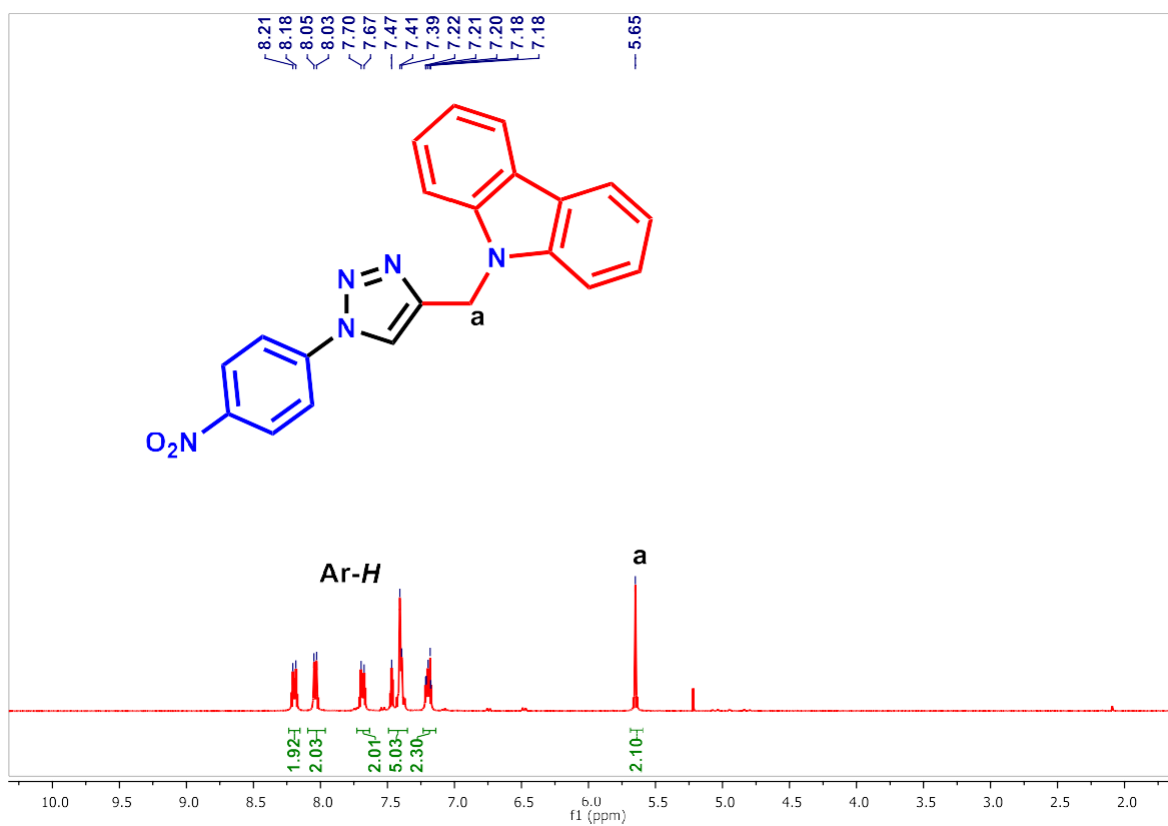

Fig. S28.  $^1\text{H NMR}$  of 1e in  $\text{CDCl}_3$  at  $25\text{ }^\circ\text{C}$ .

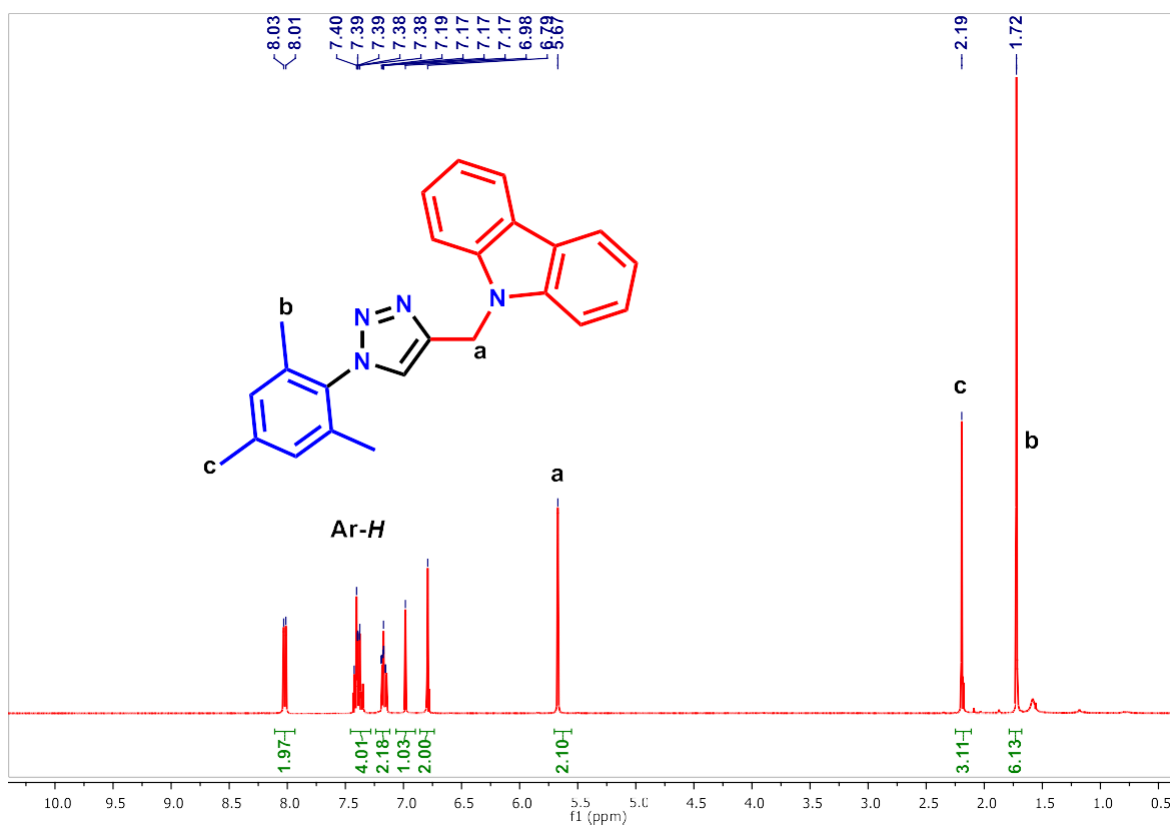

Fig. S29.  $^1\text{H}$  NMR of **1f** in  $\text{CDCl}_3$  at 25 °C.

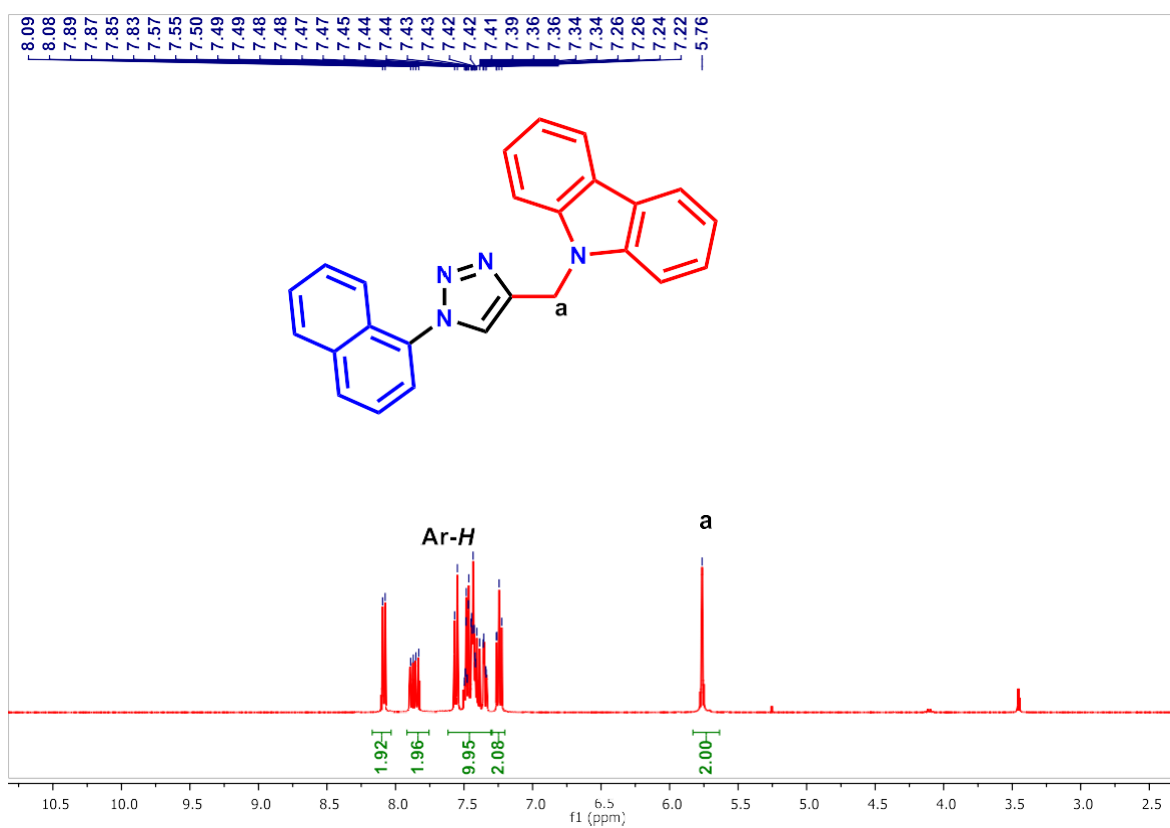

Fig. S30.  $^1\text{H}$  NMR of **1g** in  $\text{CDCl}_3$  at 25 °C.



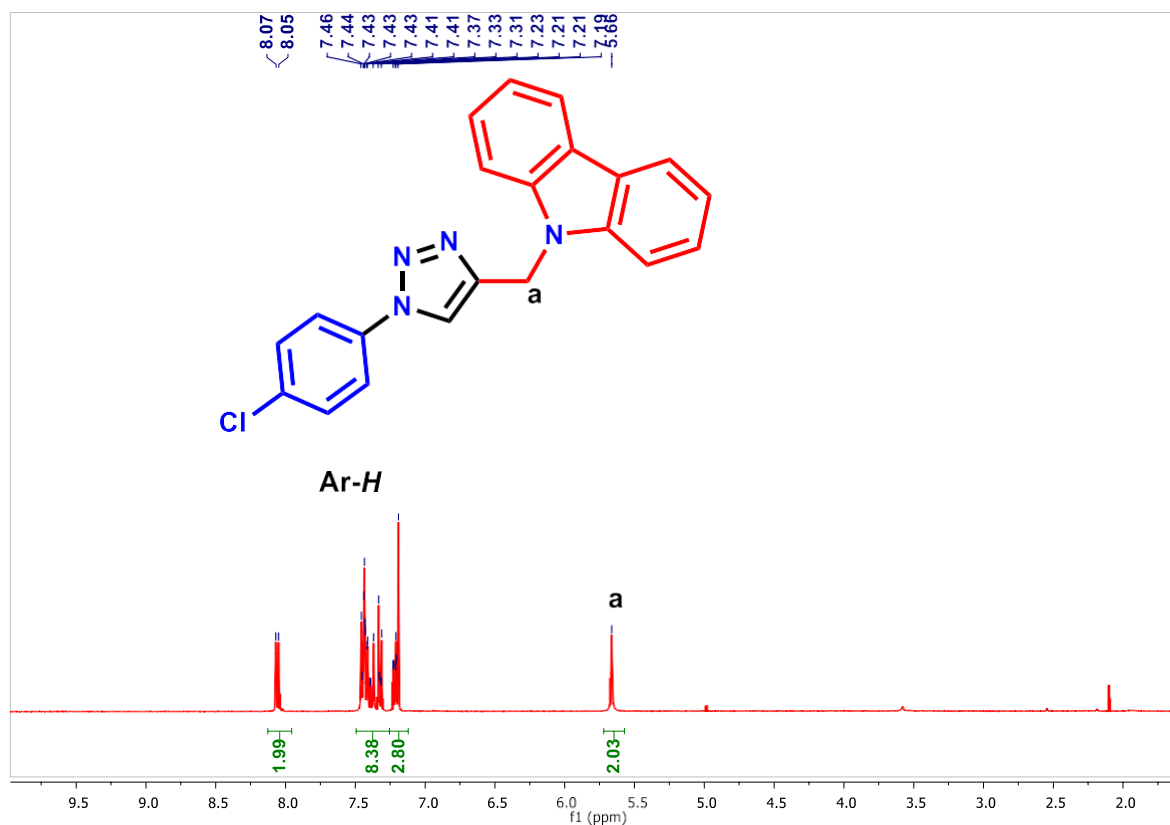

Fig. S31.  $^1\text{H NMR}$  of **1h** in  $\text{CDCl}_3$  at 25 °C

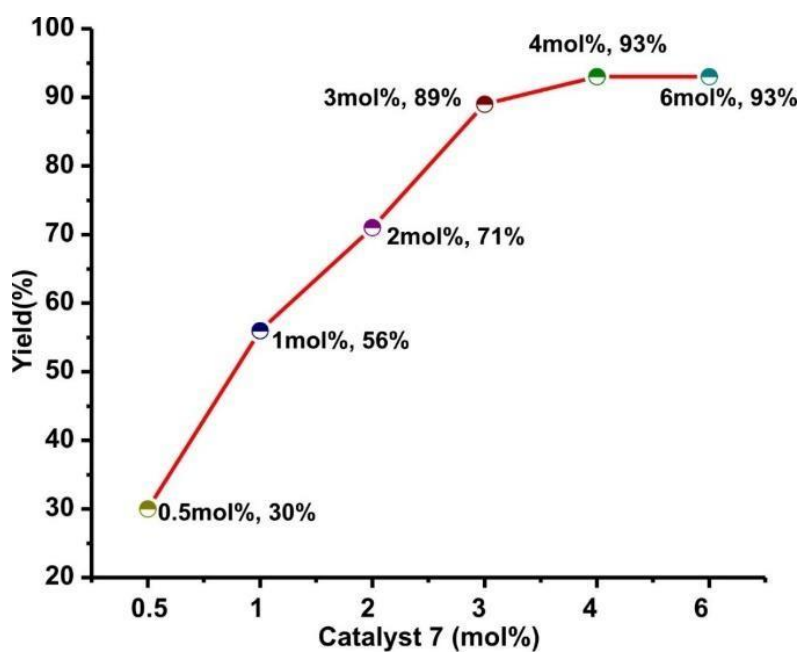

Fig. S32. Effect of catalyst **7** loading on [3+2] cycloaddition reaction between mesityl azide and phenylacetylene at ambient temperature, 2 h in DCM and MeOH mixture.

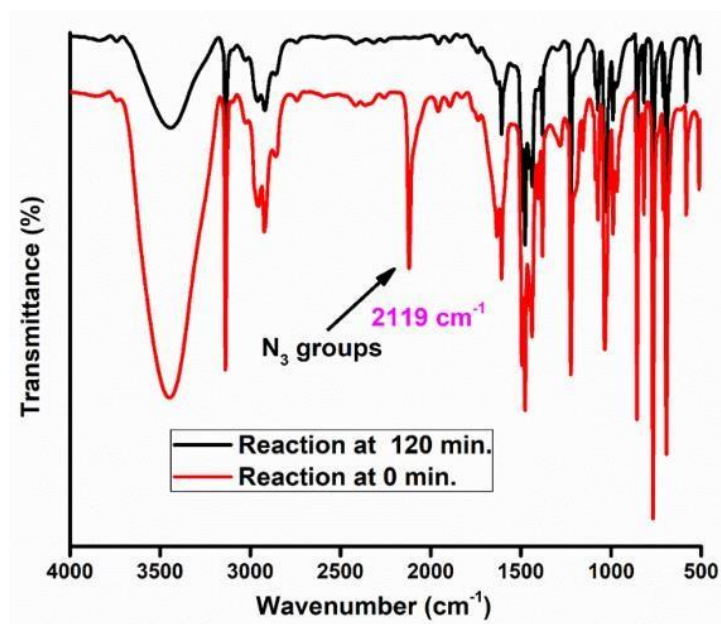

Fig. S33. FT-IR spectra of a mixture of phenylacetylene and mesityl azide in 0 min. and 120 min

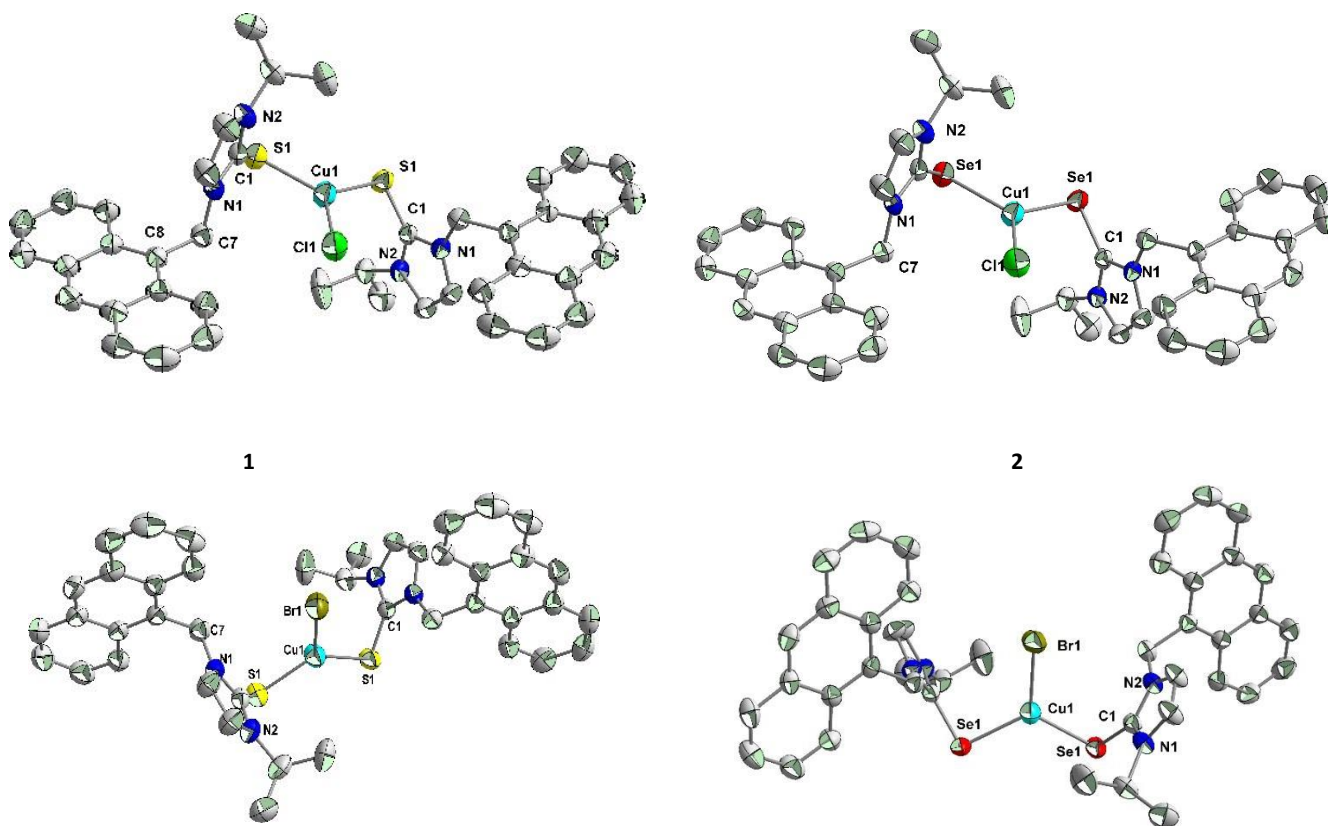

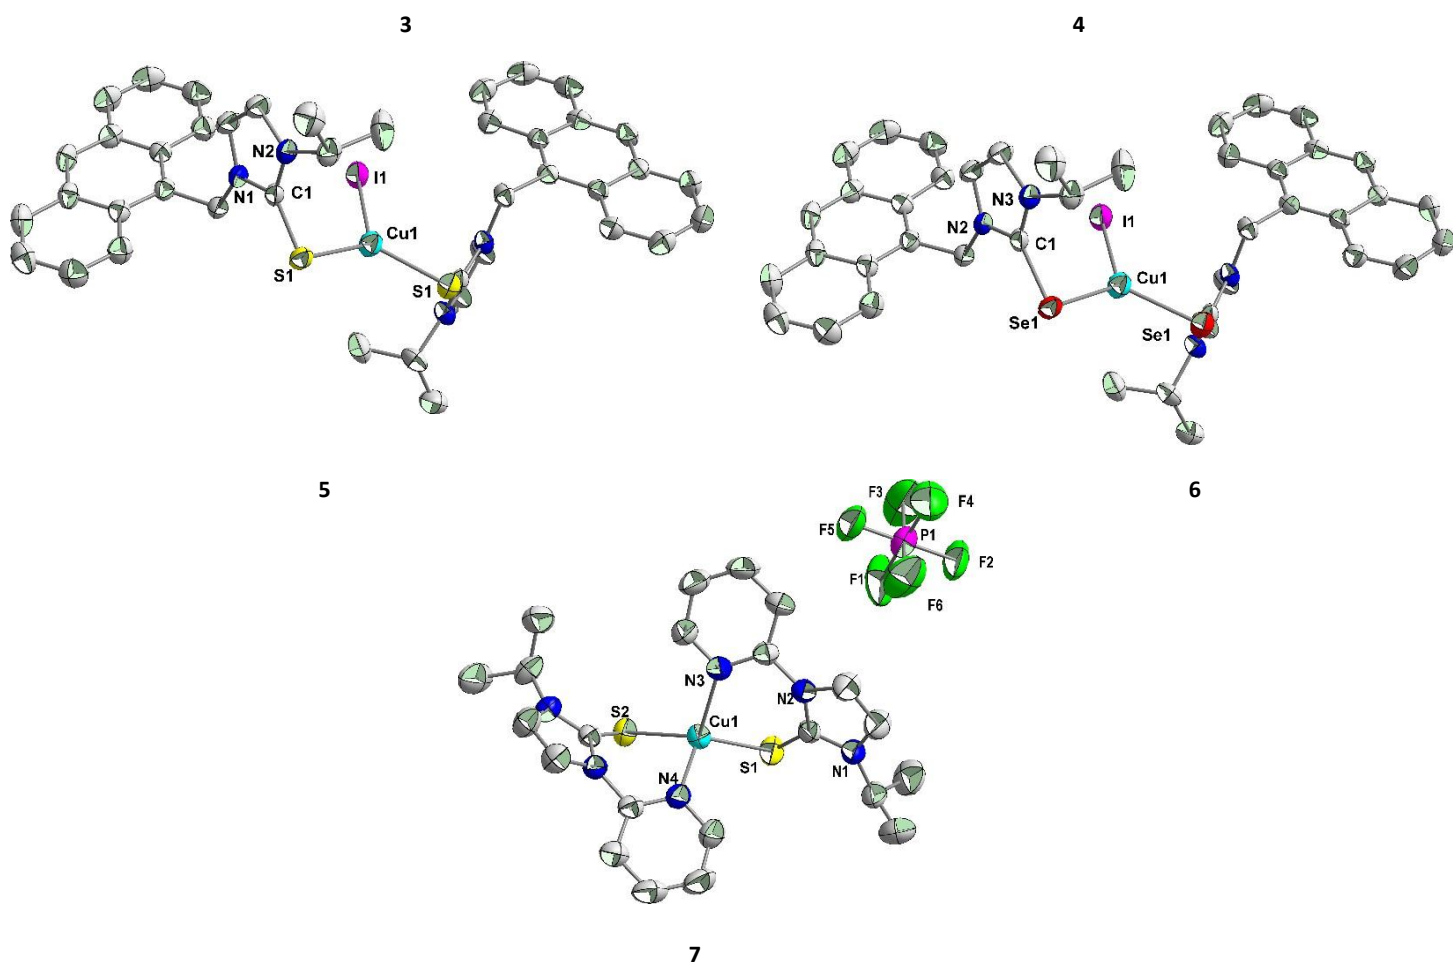

Fig. 34. The thermal ellipsoidal structures of 1-7. The hydrogen atoms have been omitted for clarity.

Table S1. The structural parameters of 1-4.

|                                    | 1                                                                  | 2                                                                  | 3                                                                  | 4                                                                   |
|------------------------------------|--------------------------------------------------------------------|--------------------------------------------------------------------|--------------------------------------------------------------------|---------------------------------------------------------------------|
| Empirical formula                  | C <sub>42</sub> H <sub>40</sub> N <sub>4</sub> S <sub>2</sub> ClCu | C <sub>42</sub> H <sub>40</sub> N <sub>4</sub> S <sub>2</sub> ClCu | C <sub>42</sub> H <sub>40</sub> N <sub>4</sub> S <sub>2</sub> BrCu | C <sub>42</sub> H <sub>40</sub> N <sub>4</sub> Se <sub>2</sub> BrCu |
| Formula weight                     | 763.89                                                             | 857.69                                                             | 812.35                                                             | 902.15                                                              |
| Temperature/K                      | 273.15                                                             | 299                                                                | 273.15                                                             | 273.15                                                              |
| Crystal system                     | monoclinic                                                         | monoclinic                                                         | monoclinic                                                         | monoclinic                                                          |
| Space group                        | C2/c                                                               | C2/c                                                               | C2/c                                                               | C2/c                                                                |
| a/Å                                | 28.019(3)                                                          | 28.106(7)                                                          | 28.070(16)                                                         | 28.090(19)                                                          |
| b/Å                                | 10.1880(9)                                                         | 10.306(3)                                                          | 10.219(5)                                                          | 10.332(6)                                                           |
| c/Å                                | 14.114(12)                                                         | 14.197(3)                                                          | 14.185(8)                                                          | 14.202(9)                                                           |
| α/°                                | 90                                                                 | 90                                                                 | 90                                                                 | 90                                                                  |
| β/°                                | 115.370(3)                                                         | 116.160(10)                                                        | 114.84(3)                                                          | 115.758(4)                                                          |
| γ/°                                | 90                                                                 | 90                                                                 | 90                                                                 | 90                                                                  |
| Volume/Å <sup>3</sup>              | 3640.4(6)                                                          | 3691.6(16)                                                         | 3693(3)                                                            | 3712.5(4)                                                           |
| Z                                  | 4                                                                  | 4                                                                  | 4                                                                  | 4                                                                   |
| ρ <sub>calc</sub> /cm <sup>3</sup> | 1.394                                                              | 1.543                                                              | 1.461                                                              | 1.614                                                               |
| μ/mm <sup>-1</sup>                 | 0.825                                                              | 2.672                                                              | 1.825                                                              | 3.662                                                               |
| F(000)                             | 1592.0                                                             | 1736.0                                                             | 1672.0                                                             | 1808.0                                                              |
| Crystal size/mm <sup>3</sup>       | 0.117 × 0.065 × 0.035                                              | 0.28 × 0.25 × 0.17                                                 | 0.28 × 0.17 × 0.17                                                 | 0.28 × 0.17 × 0.17                                                  |
| Radiation                          | MoKα (λ=0.71073)                                                   | MoKα (λ=0.71073)                                                   | MoKα (λ = 0.71073)                                                 | MoKα (λ = 0.71073)                                                  |

|                                                  |                                                               |                                                               |                                                               |                                                               |
|--------------------------------------------------|---------------------------------------------------------------|---------------------------------------------------------------|---------------------------------------------------------------|---------------------------------------------------------------|
| 2 $\theta$ range for data collection/ $^{\circ}$ | 4.31 to 54.208                                                | 4.268 to 54.44                                                | 4.294 to 54.536                                               | 4.258 to 54.244                                               |
| Index ranges                                     | $-35 \leq h \leq 35, -13 \leq k \leq 13, -16 \leq l \leq 18$  | $-35 \leq h \leq 36, -13 \leq k \leq 12, -18 \leq l \leq 16$  | $-35 \leq h \leq 36, -10 \leq k \leq 13, -18 \leq l \leq 18$  | $-36 \leq h \leq 36, -12 \leq k \leq 13, -18 \leq l \leq 18$  |
| Reflections collected                            | 29121                                                         | 22075                                                         | 31839                                                         | 36317                                                         |
| Independent reflections                          | 4013 [ $R_{\text{int}} = 0.0945, R_{\text{sigma}} = 0.0580$ ] | 4099 [ $R_{\text{int}} = 0.0559, R_{\text{sigma}} = 0.0429$ ] | 4106 [ $R_{\text{int}} = 0.0922, R_{\text{sigma}} = 0.0540$ ] | 4114 [ $R_{\text{int}} = 0.1008, R_{\text{sigma}} = 0.0532$ ] |
| Data/restraints/parameters                       | 4013/0/229                                                    | 4099/0/229                                                    | 4106/0/229                                                    | 4114/0/229                                                    |
| Goodness-of-fit on $F^2$                         | 1.017                                                         | 1.034                                                         | 1.014                                                         | 1.030                                                         |
| Final R indexes [ $ I  \geq 2\sigma(I)$ ]        | $R_1 = 0.0406, wR_2 = 0.0838$                                 | $R_1 = 0.0332, wR_2 = 0.0693$                                 | $R_1 = 0.0460, wR_2 = 0.1111$                                 | $R_1 = 0.0342, wR_2 = 0.0767$                                 |
| Final R indexes [all data]                       | $R_1 = 0.0961, wR_2 = 0.1041$                                 | $R_1 = 0.0585, wR_2 = 0.0776$                                 | $R_1 = 0.0983, wR_2 = 0.1365$                                 | $R_1 = 0.0663, wR_2 = 0.0899$                                 |
| Largest diff. peak/hole / $e \text{ \AA}^{-3}$   | 0.20/-0.31                                                    | 0.32/-0.35                                                    | 0.38/-0.57                                                    | 0.39/-0.52                                                    |

**Table S2.** The structural parameters of 5-7.

|                                                  | 5                                                             | 6                                                             | 7                                                             |
|--------------------------------------------------|---------------------------------------------------------------|---------------------------------------------------------------|---------------------------------------------------------------|
| Empirical formula                                | $C_{42}H_{40}N_4S_2ICu$                                       | $C_{42}H_{40}N_4Se_2ICu$                                      | $C_{22}H_{26}CuF_6N_6PS_2$                                    |
| Formula weight                                   | 855.34                                                        | 949.14                                                        | 647.12                                                        |
| Temperature/K                                    | 273.15                                                        | 273.15                                                        | 273.15                                                        |
| Crystal system                                   | monoclinic                                                    | monoclinic                                                    | triclinic                                                     |
| Space group                                      | C2/c                                                          | C2/c                                                          | P-1                                                           |
| a/ $\text{\AA}$                                  | 28.154(6)                                                     | 28.1758(15)                                                   | 11.7935(7)                                                    |
| b/ $\text{\AA}$                                  | 10.252(2)                                                     | 10.3689(4)                                                    | 12.0809(7)                                                    |
| c/ $\text{\AA}$                                  | 14.169(3)                                                     | 14.2314(6)                                                    | 12.2924(7)                                                    |
| $\alpha/^\circ$                                  | 90                                                            | 90                                                            | 102.000(2)                                                    |
| $\beta/^\circ$                                   | 114.508(12)                                                   | 115.236(3)                                                    | 110.065(2)                                                    |
| $\gamma/^\circ$                                  | 90                                                            | 90                                                            | 111.341(2)                                                    |
| Volume/ $\text{\AA}^3$                           | 3721.0(14)                                                    | 3760.9(3)                                                     | 1417.11(15)                                                   |
| Z                                                | 4                                                             | 4                                                             | 2                                                             |
| $\rho_{\text{calc}}/\text{cm}^3$                 | 1.527                                                         | 1.676                                                         | 1.517                                                         |
| $\mu/\text{mm}^{-1}$                             | 1.565                                                         | 3.373                                                         | 1.037                                                         |
| F(000)                                           | 1736.0                                                        | 1880.0                                                        | 660.0                                                         |
| Crystal size/ $\text{mm}^3$                      | $0.28 \times 0.17 \times 0.17$                                | $0.28 \times 0.17 \times 0.17$                                | $0.08 \times 0.07 \times 0.06$                                |
| Radiation                                        | MoK $\alpha$ ( $\lambda = 0.71073$ )                          | MoK $\alpha$ ( $\lambda = 0.71073$ )                          | MoK $\alpha$ ( $\lambda = 0.71073$ )                          |
| 2 $\theta$ range for data collection/ $^{\circ}$ | 4.28 to 54.668                                                | 4.24 to 54.222                                                | 3.814 to 54.206                                               |
| Index ranges                                     | $-36 \leq h \leq 36, -13 \leq k \leq 13, -17 \leq l \leq 18$  | $-36 \leq h \leq 36, -13 \leq k \leq 13, -18 \leq l \leq 18$  | $-15 \leq h \leq 15, -15 \leq k \leq 15, -14 \leq l \leq 15$  |
| Reflections collected                            | 35507                                                         | 42344                                                         | 33022                                                         |
| Independent reflections                          | 4179 [ $R_{\text{int}} = 0.0665, R_{\text{sigma}} = 0.0380$ ] | 4162 [ $R_{\text{int}} = 0.0476, R_{\text{sigma}} = 0.0228$ ] | 6254 [ $R_{\text{int}} = 0.0605, R_{\text{sigma}} = 0.0438$ ] |
| Data/restraints/parameters                       | 4179/0/229                                                    | 4162/0/229                                                    | 6254/0/347                                                    |
| Goodness-of-fit on $F^2$                         | 1.038                                                         | 1.026                                                         | 1.018                                                         |
| Final R indexes [ $ I  \geq 2\sigma(I)$ ]        | $R_1 = 0.0273, wR_2 = 0.0709$                                 | $R_1 = 0.0241, wR_2 = 0.0518$                                 | $R_1 = 0.0497, wR_2 = 0.1230$                                 |
| Final R indexes [all data]                       | $R_1 = 0.0303, wR_2 = 0.0729$                                 | $R_1 = 0.0339, wR_2 = 0.0551$                                 | $R_1 = 0.0830, wR_2 = 0.1421$                                 |
| Largest diff. peak/hole / $e \text{ \AA}^{-3}$   | 0.51/-0.73                                                    | 0.47/-0.59                                                    | 0.58/-0.51                                                    |

**Table 3.** Selected bond lengths of **1-6**.

|        | <b>1</b>   | <b>2</b>   | <b>3</b>                | <b>4</b>  | <b>5</b>   | <b>6</b>  |
|--------|------------|------------|-------------------------|-----------|------------|-----------|
|        |            |            | <i>Bond Lengths [Å]</i> |           |            |           |
| C1-E1  | 1.708(2)   | 1.867(2)   | 1.719(3)                | 1.865(3)  | 1.7174(18) | 1.867(2)  |
| Cu1-E1 | 2.2603(7)  | 2.3742(4)  | 2.2583(14)              | 2.3661(4) | 2.2544(6)  | 2.3654(3) |
| Cu1-X1 | 2.2555(11) | 2.2426(12) | 2.4036(14)              | 2.3883(7) | 2.5793(7)  | 2.5641(5) |

**Table 4.** Selected bond angles of **1-6**.

|            | <b>1</b>  | <b>2</b>   | <b>3</b>               | <b>4</b>    | <b>5</b>    | <b>6</b>    |
|------------|-----------|------------|------------------------|-------------|-------------|-------------|
|            |           |            | <i>Bond angles [°]</i> |             |             |             |
| N1-C1-E1   | 127.0(2)  | 126.44(18) | 126.7(3)               | 127.1(2)    | 126.79(14)  | 126.67(16)  |
| C1-E1-Cu1  | 96.75(9)  | 93.43(7)   | 97.41(12)              | 93.85(8)    | 97.97(6)    | 94.34(6)    |
| E1-Cu1-X1  | 120.76(2) | 122.35(12) | 118.59(3)              | 120.060(14) | 116.610(16) | 118.100(10) |
| E1-Cu1-E1' | 118.48(4) | 115.29(2)  | 122.83(6)              | 119.88(3)   | 126.78(3)   | 123.80(2)   |

**Table 5.** Selected bond lengths (Å) and bond angles (°) of **7**.

| <i>Bond length (Å)</i> |            | <i>Bond angle (°)</i> |            |
|------------------------|------------|-----------------------|------------|
| Cu1-S1                 | 2.2476(10) | S1-Cu1-S2             | 128.82(4)  |
| Cu1-S2                 | 2.2721(9)  | N3-Cu1-S1             | 95.92(8)   |
| Cu1-N3                 | 1.711(3)   | N3-Cu1-S2             | 112.17(8)  |
| Cu1-N4                 | 2.124(3)   | N3-Cu1-N4             | 116.25(11) |
| S1-C1                  | 1.693(3)   |                       |            |

**Table S6.** Comparison of catalytic efficiency of **7** with known Cu(I) catalysts for the formation of triazole product.

| <b>Catalyst</b>                       | <b>Solvent</b>    | <b>T/°C</b> | <b>t/h</b> | <b>Cu/mmol</b> | <b>Triazole product</b>                                                              | <b>Yield/%</b> | <b>ESI Ref.</b>  |
|---------------------------------------|-------------------|-------------|------------|----------------|--------------------------------------------------------------------------------------|----------------|------------------|
| CuI-USY                               | PhCH <sub>3</sub> | 25 °C       | 15 h       | 10             | 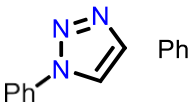 | 59             | 1                |
| [Cu(Bn2-<br>imy)(IPr)]PF <sub>6</sub> | H <sub>2</sub> O  | 60 °C       | 16 h       | 1              |  | 71             | 2                |
| (MeCN) <sub>4</sub> CuBF <sub>4</sub> | DCM               | rt          | 24 h       | 5              |  | 46             | 3                |
| Cat. <b>7</b>                         | DCM:MeO<br>H      | 25 °C       | 2 h        | 4              |  | 86             | <b>This work</b> |

|                                                                                       |                                                    |       |        |    |                                                                                      |       |                  |
|---------------------------------------------------------------------------------------|----------------------------------------------------|-------|--------|----|--------------------------------------------------------------------------------------|-------|------------------|
| [Cu(Bn2-<br>imy)(IPr)]PF <sub>6</sub>                                                 | H <sub>2</sub> O                                   | 60 °C | 16 h   | 1  | 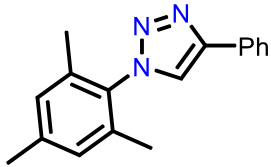   | 71    | 2                |
| Cat.7                                                                                 | DCM:MeO<br>H                                       | 25 °C | 2 h    | 4  |    | 93    | <b>This work</b> |
| [Cu]                                                                                  | H <sub>2</sub> O                                   | 60 °C | 16 h   | 1  |    | 83    | 1                |
| Cat.7                                                                                 | DCM:MeO<br>H                                       | 25 °C | 2 h    | 4  |    | 91    | <b>This work</b> |
| CuI                                                                                   | [bmim][BF<br>4]/ H <sub>2</sub> O                  | 25 °C | 12 h   | 15 |  | 68    | 4                |
| [Cu]                                                                                  | H <sub>2</sub> O                                   | 60 °C | 16 h   | 1  |  | trace | 1                |
| Cat.7                                                                                 | DCM:MeO<br>H                                       | 25 °C | 2 h    | 4  |  | 82    | <b>This work</b> |
| CuSO <sub>4</sub> •5H <sub>2</sub> O<br>(20 mol%)<br>sodium<br>ascorbate (20<br>mol%) | Add t-<br>butanol:<br>water<br>(1:1, v/v,<br>4 mL) | 25 °C | 8-10 h | 20 |  | 87    |                  |

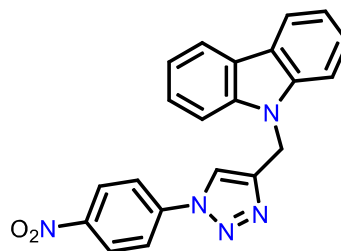

## References

- 1 S. Chassaing, M. Kumarraja, A. Sani Souna Sido, P. Pale and J. Sommer, *Org. Lett.*, 2007, **9**, 883–886.
- 2 S. Guo, M. H. Lim and H. V. Huynh, *Organometallics*, 2013, **32**, 7225–7233.
- 3 K. Sugiyama, Y. Sakata, T. Niwa, S. Yoshida and T. Hosoya, *Chem. Commun.*, 2022, **58**, 6235–6238.
- 4 Y.-B. Zhao, Z.-Y. Yan and Y.-M. Liang, *Tetrahedron Letters*, 2006, **47**, 1545–1549.
